# Supplementary material
Source: publisher figshare collection journal article supplement (https://gsapubs.figshare.com/articles/dataset/_/12530240)

DR2013331 A.M. Satkoski et al.

Satkoski et al. Likeness Metric excel file available as well.

Enter **Sample 1** and **Sample 2** Names into **B5** and **B6**, respectively.  
Enter Ages and Errors for **Samples 1** and **Sample 2** into **B11..C210** and **E11..F210**, respectively ( $\leq 200$  ages)  
Enter **Bin Size** into **B7** ( $\geq 2$  Ma)

Name 1 **Sample One** ( $\leq 200$ )      Likeness = 8.33 %  
Name 2 **Sample Two** ( $\leq 200$ )  
Bin Size **2** ( $\geq 2$ )

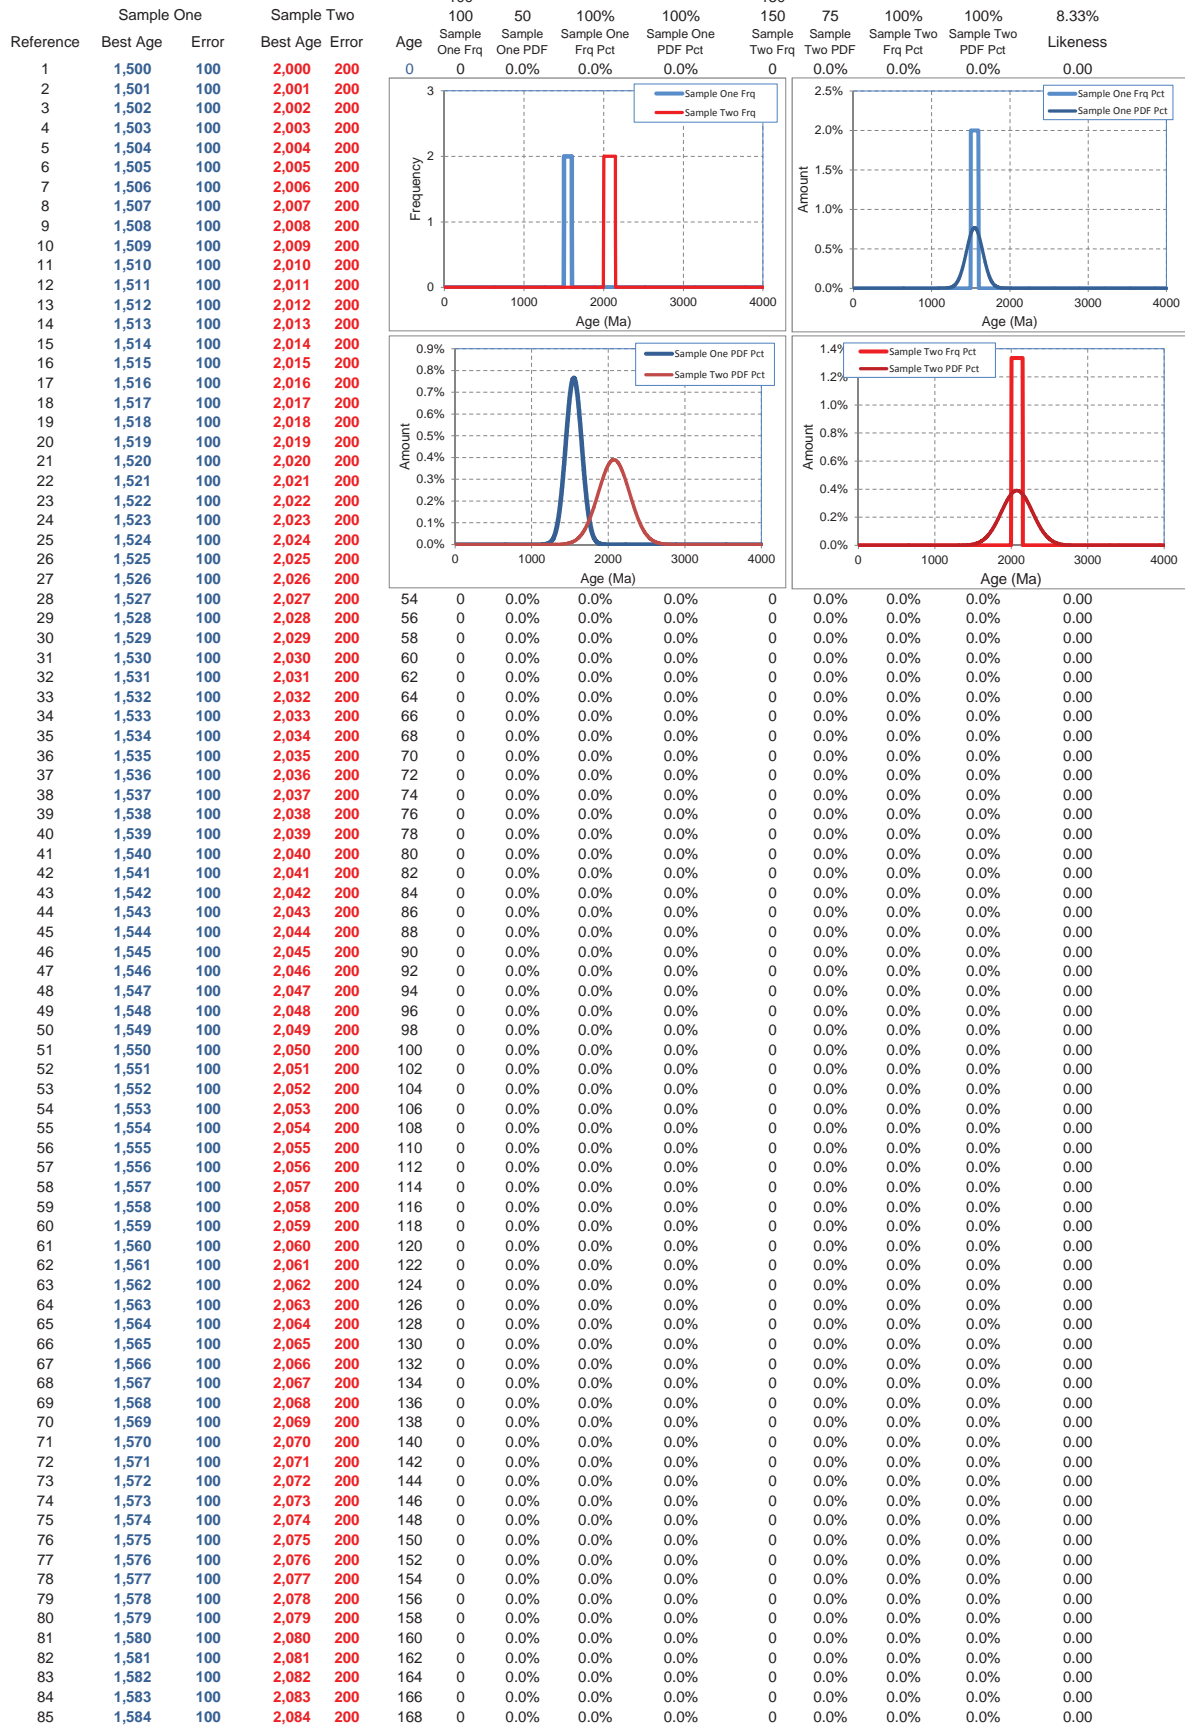

|     |       |     |       |     |     |   |      |      |      |   |      |      |      |      |
|-----|-------|-----|-------|-----|-----|---|------|------|------|---|------|------|------|------|
|     | 1,585 | 100 | 2,085 | 200 | 170 | 0 | 0.0% | 0.0% | 0.0% | 0 | 0.0% | 0.0% | 0.0% | 0.00 |
| 87  | 1,586 | 100 | 2,086 | 200 | 172 | 0 | 0.0% | 0.0% | 0.0% | 0 | 0.0% | 0.0% | 0.0% | 0.00 |
| 88  | 1,587 | 100 | 2,087 | 200 | 174 | 0 | 0.0% | 0.0% | 0.0% | 0 | 0.0% | 0.0% | 0.0% | 0.00 |
| 89  | 1,588 | 100 | 2,088 | 200 | 176 | 0 | 0.0% | 0.0% | 0.0% | 0 | 0.0% | 0.0% | 0.0% | 0.00 |
| 90  | 1,589 | 100 | 2,089 | 200 | 178 | 0 | 0.0% | 0.0% | 0.0% | 0 | 0.0% | 0.0% | 0.0% | 0.00 |
| 91  | 1,590 | 100 | 2,090 | 200 | 180 | 0 | 0.0% | 0.0% | 0.0% | 0 | 0.0% | 0.0% | 0.0% | 0.00 |
| 92  | 1,591 | 100 | 2,091 | 200 | 182 | 0 | 0.0% | 0.0% | 0.0% | 0 | 0.0% | 0.0% | 0.0% | 0.00 |
| 93  | 1,592 | 100 | 2,092 | 200 | 184 | 0 | 0.0% | 0.0% | 0.0% | 0 | 0.0% | 0.0% | 0.0% | 0.00 |
| 94  | 1,593 | 100 | 2,093 | 200 | 186 | 0 | 0.0% | 0.0% | 0.0% | 0 | 0.0% | 0.0% | 0.0% | 0.00 |
| 95  | 1,594 | 100 | 2,094 | 200 | 188 | 0 | 0.0% | 0.0% | 0.0% | 0 | 0.0% | 0.0% | 0.0% | 0.00 |
| 96  | 1,595 | 100 | 2,095 | 200 | 190 | 0 | 0.0% | 0.0% | 0.0% | 0 | 0.0% | 0.0% | 0.0% | 0.00 |
| 97  | 1,596 | 100 | 2,096 | 200 | 192 | 0 | 0.0% | 0.0% | 0.0% | 0 | 0.0% | 0.0% | 0.0% | 0.00 |
| 98  | 1,597 | 100 | 2,097 | 200 | 194 | 0 | 0.0% | 0.0% | 0.0% | 0 | 0.0% | 0.0% | 0.0% | 0.00 |
| 99  | 1,598 | 100 | 2,098 | 200 | 196 | 0 | 0.0% | 0.0% | 0.0% | 0 | 0.0% | 0.0% | 0.0% | 0.00 |
| 100 | 1,599 | 100 | 2,099 | 200 | 198 | 0 | 0.0% | 0.0% | 0.0% | 0 | 0.0% | 0.0% | 0.0% | 0.00 |
| 101 |       |     | 2,100 | 200 | 200 | 0 | 0.0% | 0.0% | 0.0% | 0 | 0.0% | 0.0% | 0.0% | 0.00 |
| 102 |       |     | 2,101 | 200 | 202 | 0 | 0.0% | 0.0% | 0.0% | 0 | 0.0% | 0.0% | 0.0% | 0.00 |
| 103 |       |     | 2,102 | 200 | 204 | 0 | 0.0% | 0.0% | 0.0% | 0 | 0.0% | 0.0% | 0.0% | 0.00 |
| 104 |       |     | 2,103 | 200 | 206 | 0 | 0.0% | 0.0% | 0.0% | 0 | 0.0% | 0.0% | 0.0% | 0.00 |
| 105 |       |     | 2,104 | 200 | 208 | 0 | 0.0% | 0.0% | 0.0% | 0 | 0.0% | 0.0% | 0.0% | 0.00 |
| 106 |       |     | 2,105 | 200 | 210 | 0 | 0.0% | 0.0% | 0.0% | 0 | 0.0% | 0.0% | 0.0% | 0.00 |
| 107 |       |     | 2,106 | 200 | 212 | 0 | 0.0% | 0.0% | 0.0% | 0 | 0.0% | 0.0% | 0.0% | 0.00 |
| 108 |       |     | 2,107 | 200 | 214 | 0 | 0.0% | 0.0% | 0.0% | 0 | 0.0% | 0.0% | 0.0% | 0.00 |
| 109 |       |     | 2,108 | 200 | 216 | 0 | 0.0% | 0.0% | 0.0% | 0 | 0.0% | 0.0% | 0.0% | 0.00 |
| 110 |       |     | 2,109 | 200 | 218 | 0 | 0.0% | 0.0% | 0.0% | 0 | 0.0% | 0.0% | 0.0% | 0.00 |
| 111 |       |     | 2,110 | 200 | 220 | 0 | 0.0% | 0.0% | 0.0% | 0 | 0.0% | 0.0% | 0.0% | 0.00 |
| 112 |       |     | 2,111 | 200 | 222 | 0 | 0.0% | 0.0% | 0.0% | 0 | 0.0% | 0.0% | 0.0% | 0.00 |
| 113 |       |     | 2,112 | 200 | 224 | 0 | 0.0% | 0.0% | 0.0% | 0 | 0.0% | 0.0% | 0.0% | 0.00 |
| 114 |       |     | 2,113 | 200 | 226 | 0 | 0.0% | 0.0% | 0.0% | 0 | 0.0% | 0.0% | 0.0% | 0.00 |
| 115 |       |     | 2,114 | 200 | 228 | 0 | 0.0% | 0.0% | 0.0% | 0 | 0.0% | 0.0% | 0.0% | 0.00 |
| 116 |       |     | 2,115 | 200 | 230 | 0 | 0.0% | 0.0% | 0.0% | 0 | 0.0% | 0.0% | 0.0% | 0.00 |
| 117 |       |     | 2,116 | 200 | 232 | 0 | 0.0% | 0.0% | 0.0% | 0 | 0.0% | 0.0% | 0.0% | 0.00 |
| 118 |       |     | 2,117 | 200 | 234 | 0 | 0.0% | 0.0% | 0.0% | 0 | 0.0% | 0.0% | 0.0% | 0.00 |
| 119 |       |     | 2,118 | 200 | 236 | 0 | 0.0% | 0.0% | 0.0% | 0 | 0.0% | 0.0% | 0.0% | 0.00 |
| 120 |       |     | 2,119 | 200 | 238 | 0 | 0.0% | 0.0% | 0.0% | 0 | 0.0% | 0.0% | 0.0% | 0.00 |
| 121 |       |     | 2,120 | 200 | 240 | 0 | 0.0% | 0.0% | 0.0% | 0 | 0.0% | 0.0% | 0.0% | 0.00 |
| 122 |       |     | 2,121 | 200 | 242 | 0 | 0.0% | 0.0% | 0.0% | 0 | 0.0% | 0.0% | 0.0% | 0.00 |
| 123 |       |     | 2,122 | 200 | 244 | 0 | 0.0% | 0.0% | 0.0% | 0 | 0.0% | 0.0% | 0.0% | 0.00 |
| 124 |       |     | 2,123 | 200 | 246 | 0 | 0.0% | 0.0% | 0.0% | 0 | 0.0% | 0.0% | 0.0% | 0.00 |
| 125 |       |     | 2,124 | 200 | 248 | 0 | 0.0% | 0.0% | 0.0% | 0 | 0.0% | 0.0% | 0.0% | 0.00 |
| 126 |       |     | 2,125 | 200 | 250 | 0 | 0.0% | 0.0% | 0.0% | 0 | 0.0% | 0.0% | 0.0% | 0.00 |
| 127 |       |     | 2,126 | 200 | 252 | 0 | 0.0% | 0.0% | 0.0% | 0 | 0.0% | 0.0% | 0.0% | 0.00 |
| 128 |       |     | 2,127 | 200 | 254 | 0 | 0.0% | 0.0% | 0.0% | 0 | 0.0% | 0.0% | 0.0% | 0.00 |
| 129 |       |     | 2,128 | 200 | 256 | 0 | 0.0% | 0.0% | 0.0% | 0 | 0.0% | 0.0% | 0.0% | 0.00 |
| 130 |       |     | 2,129 | 200 | 258 | 0 | 0.0% | 0.0% | 0.0% | 0 | 0.0% | 0.0% | 0.0% | 0.00 |
| 131 |       |     | 2,130 | 200 | 260 | 0 | 0.0% | 0.0% | 0.0% | 0 | 0.0% | 0.0% | 0.0% | 0.00 |
| 132 |       |     | 2,131 | 200 | 262 | 0 | 0.0% | 0.0% | 0.0% | 0 | 0.0% | 0.0% | 0.0% | 0.00 |
| 133 |       |     | 2,132 | 200 | 264 | 0 | 0.0% | 0.0% | 0.0% | 0 | 0.0% | 0.0% | 0.0% | 0.00 |
| 134 |       |     | 2,133 | 200 | 266 | 0 | 0.0% | 0.0% | 0.0% | 0 | 0.0% | 0.0% | 0.0% | 0.00 |
| 135 |       |     | 2,134 | 200 | 268 | 0 | 0.0% | 0.0% | 0.0% | 0 | 0.0% | 0.0% | 0.0% | 0.00 |
| 136 |       |     | 2,135 | 200 | 270 | 0 | 0.0% | 0.0% | 0.0% | 0 | 0.0% | 0.0% | 0.0% | 0.00 |
| 137 |       |     | 2,136 | 200 | 272 | 0 | 0.0% | 0.0% | 0.0% | 0 | 0.0% | 0.0% | 0.0% | 0.00 |
| 138 |       |     | 2,137 | 200 | 274 | 0 | 0.0% | 0.0% | 0.0% | 0 | 0.0% | 0.0% | 0.0% | 0.00 |
| 139 |       |     | 2,138 | 200 | 276 | 0 | 0.0% | 0.0% | 0.0% | 0 | 0.0% | 0.0% | 0.0% | 0.00 |
| 140 |       |     | 2,139 | 200 | 278 | 0 | 0.0% | 0.0% | 0.0% | 0 | 0.0% | 0.0% | 0.0% | 0.00 |
| 141 |       |     | 2,140 | 200 | 280 | 0 | 0.0% | 0.0% | 0.0% | 0 | 0.0% | 0.0% | 0.0% | 0.00 |
| 142 |       |     | 2,141 | 200 | 282 | 0 | 0.0% | 0.0% | 0.0% | 0 | 0.0% | 0.0% | 0.0% | 0.00 |
| 143 |       |     | 2,142 | 200 | 284 | 0 | 0.0% | 0.0% | 0.0% | 0 | 0.0% | 0.0% | 0.0% | 0.00 |
| 144 |       |     | 2,143 | 200 | 286 | 0 | 0.0% | 0.0% | 0.0% | 0 | 0.0% | 0.0% | 0.0% | 0.00 |
| 145 |       |     | 2,144 | 200 | 288 | 0 | 0.0% | 0.0% | 0.0% | 0 | 0.0% | 0.0% | 0.0% | 0.00 |
| 146 |       |     | 2,145 | 200 | 290 | 0 | 0.0% | 0.0% | 0.0% | 0 | 0.0% | 0.0% | 0.0% | 0.00 |
| 147 |       |     | 2,146 | 200 | 292 | 0 | 0.0% | 0.0% | 0.0% | 0 | 0.0% | 0.0% | 0.0% | 0.00 |
| 148 |       |     | 2,147 | 200 | 294 | 0 | 0.0% | 0.0% | 0.0% | 0 | 0.0% | 0.0% | 0.0% | 0.00 |
| 149 |       |     | 2,148 | 200 | 296 | 0 | 0.0% | 0.0% | 0.0% | 0 | 0.0% | 0.0% | 0.0% | 0.00 |
| 150 |       |     | 2,149 | 200 | 298 | 0 | 0.0% | 0.0% | 0.0% | 0 | 0.0% | 0.0% | 0.0% | 0.00 |
| 151 |       |     |       |     | 300 | 0 | 0.0% | 0.0% | 0.0% | 0 | 0.0% | 0.0% | 0.0% | 0.00 |
| 152 |       |     |       |     | 302 | 0 | 0.0% | 0.0% | 0.0% | 0 | 0.0% | 0.0% | 0.0% | 0.00 |
| 153 |       |     |       |     | 304 | 0 | 0.0% | 0.0% | 0.0% | 0 | 0.0% | 0.0% | 0.0% | 0.00 |
| 154 |       |     |       |     | 306 | 0 | 0.0% | 0.0% | 0.0% | 0 | 0.0% | 0.0% | 0.0% | 0.00 |
| 155 |       |     |       |     | 308 | 0 | 0.0% | 0.0% | 0.0% | 0 | 0.0% | 0.0% | 0.0% | 0.00 |
| 156 |       |     |       |     | 310 | 0 | 0.0% | 0.0% | 0.0% | 0 | 0.0% | 0.0% | 0.0% | 0.00 |
| 157 |       |     |       |     | 312 | 0 | 0.0% | 0.0% | 0.0% | 0 | 0.0% | 0.0% | 0.0% | 0.00 |
| 158 |       |     |       |     | 314 | 0 | 0.0% | 0.0% | 0.0% | 0 | 0.0% | 0.0% | 0.0% | 0.00 |
| 159 |       |     |       |     | 316 | 0 | 0.0% | 0.0% | 0.0% | 0 | 0.0% | 0.0% | 0.0% | 0.00 |
| 160 |       |     |       |     | 318 | 0 | 0.0% | 0.0% | 0.0% | 0 | 0.0% | 0.0% | 0.0% | 0.00 |
| 161 |       |     |       |     | 320 | 0 | 0.0% | 0.0% | 0.0% | 0 | 0.0% | 0.0% | 0.0% | 0.00 |
| 162 |       |     |       |     | 322 | 0 | 0.0% | 0.0% | 0.0% | 0 | 0.0% | 0.0% | 0.0% | 0.00 |
| 163 |       |     |       |     | 324 | 0 | 0.0% | 0.0% | 0.0% | 0 | 0.0% | 0.0% | 0.0% | 0.00 |
| 164 |       |     |       |     | 326 | 0 | 0.0% | 0.0% | 0.0% | 0 | 0.0% | 0.0% | 0.0% | 0.00 |
| 165 |       |     |       |     | 328 | 0 | 0.0% | 0.0% | 0.0% | 0 | 0.0% | 0.0% | 0.0% | 0.00 |
| 166 |       |     |       |     | 330 | 0 | 0.0% | 0.0% | 0.0% | 0 | 0.0% | 0.0% | 0.0% | 0.00 |
| 167 |       |     |       |     | 332 | 0 | 0.0% | 0.0% | 0.0% | 0 | 0.0% | 0.0% | 0.0% | 0.00 |
| 168 |       |     |       |     | 334 | 0 | 0.0% | 0.0% | 0.0% | 0 | 0.0% | 0.0% | 0.0% | 0.00 |
| 169 |       |     |       |     | 336 | 0 | 0.0% | 0.0% | 0.0% | 0 | 0.0% | 0.0% | 0.0% | 0.00 |
| 170 |       |     |       |     | 338 | 0 | 0.0% | 0.0% | 0.0% | 0 | 0.0% | 0.0% | 0.0% | 0.00 |
| 171 |       |     |       |     | 340 | 0 | 0.0% | 0.0% | 0.0% | 0 | 0.0% | 0.0% | 0.0% | 0.00 |
| 172 |       |     |       |     | 342 | 0 | 0.0% | 0.0% | 0.0% | 0 | 0.0% | 0.0% | 0.0% | 0.00 |
| 173 |       |     |       |     | 344 | 0 | 0.0% | 0.0% | 0.0% | 0 | 0.0% | 0.0% | 0.0% | 0.00 |
| 174 |       |     |       |     | 346 | 0 | 0.0% | 0.0% | 0.0% | 0 | 0.0% | 0.0% | 0.0% | 0.00 |
| 175 |       |     |       |     | 348 | 0 | 0.0% | 0.0% | 0.0% | 0 | 0.0% | 0.0% | 0.0% | 0.00 |
| 176 |       |     |       |     | 350 | 0 | 0.0% | 0.0% | 0.0% | 0 | 0.0% | 0.0% | 0.0% | 0.00 |
| 177 |       |     |       |     | 352 | 0 | 0.0% | 0.0% | 0.0% | 0 | 0.0% | 0.0% | 0.0% | 0.00 |
| 178 |       |     |       |     | 354 | 0 | 0.0% | 0.0% | 0.0% | 0 | 0.0% | 0.0% | 0.0% | 0.00 |
| 179 |       |     |       |     | 356 | 0 | 0.0% | 0.0% | 0.0% | 0 | 0.0% | 0.0% | 0.0% | 0.00 |
| 180 |       |     |       |     | 358 | 0 | 0.0% | 0.0% | 0.0% | 0 | 0.0% | 0.0% | 0.0% | 0.00 |
| 181 |       |     |       |     | 360 | 0 | 0.0% | 0.0% | 0.0% | 0 | 0.0% | 0.0% | 0.0% | 0.00 |

|     |   |  |   |   |   |   |     |   |      |      |      |   |      |      |      |      |
|-----|---|--|---|---|---|---|-----|---|------|------|------|---|------|------|------|------|
| 182 |   |  |   |   |   |   | 362 | 0 | 0.0% | 0.0% | 0.0% | 0 | 0.0% | 0.0% | 0.0% | 0.0% |
| 183 |   |  |   |   |   |   | 364 | 0 | 0.0% | 0.0% | 0.0% | 0 | 0.0% | 0.0% | 0.0% | 0.0% |
| 184 |   |  |   |   |   |   | 366 | 0 | 0.0% | 0.0% | 0.0% | 0 | 0.0% | 0.0% | 0.0% | 0.0% |
| 185 |   |  |   |   |   |   | 368 | 0 | 0.0% | 0.0% | 0.0% | 0 | 0.0% | 0.0% | 0.0% | 0.0% |
| 186 |   |  |   |   |   |   | 370 | 0 | 0.0% | 0.0% | 0.0% | 0 | 0.0% | 0.0% | 0.0% | 0.0% |
| 187 |   |  |   |   |   |   | 372 | 0 | 0.0% | 0.0% | 0.0% | 0 | 0.0% | 0.0% | 0.0% | 0.0% |
| 188 |   |  |   |   |   |   | 374 | 0 | 0.0% | 0.0% | 0.0% | 0 | 0.0% | 0.0% | 0.0% | 0.0% |
| 189 |   |  |   |   |   |   | 376 | 0 | 0.0% | 0.0% | 0.0% | 0 | 0.0% | 0.0% | 0.0% | 0.0% |
| 190 |   |  |   |   |   |   | 378 | 0 | 0.0% | 0.0% | 0.0% | 0 | 0.0% | 0.0% | 0.0% | 0.0% |
| 191 |   |  |   |   |   |   | 380 | 0 | 0.0% | 0.0% | 0.0% | 0 | 0.0% | 0.0% | 0.0% | 0.0% |
| 192 |   |  |   |   |   |   | 382 | 0 | 0.0% | 0.0% | 0.0% | 0 | 0.0% | 0.0% | 0.0% | 0.0% |
| 193 |   |  |   |   |   |   | 384 | 0 | 0.0% | 0.0% | 0.0% | 0 | 0.0% | 0.0% | 0.0% | 0.0% |
| 194 |   |  |   |   |   |   | 386 | 0 | 0.0% | 0.0% | 0.0% | 0 | 0.0% | 0.0% | 0.0% | 0.0% |
| 195 |   |  |   |   |   |   | 388 | 0 | 0.0% | 0.0% | 0.0% | 0 | 0.0% | 0.0% | 0.0% | 0.0% |
| 196 |   |  |   |   |   |   | 390 | 0 | 0.0% | 0.0% | 0.0% | 0 | 0.0% | 0.0% | 0.0% | 0.0% |
| 197 |   |  |   |   |   |   | 392 | 0 | 0.0% | 0.0% | 0.0% | 0 | 0.0% | 0.0% | 0.0% | 0.0% |
| 198 |   |  |   |   |   |   | 394 | 0 | 0.0% | 0.0% | 0.0% | 0 | 0.0% | 0.0% | 0.0% | 0.0% |
| 199 |   |  |   |   |   |   | 396 | 0 | 0.0% | 0.0% | 0.0% | 0 | 0.0% | 0.0% | 0.0% | 0.0% |
| 200 |   |  |   |   |   |   | 398 | 0 | 0.0% | 0.0% | 0.0% | 0 | 0.0% | 0.0% | 0.0% | 0.0% |
| x   | x |  | x | x | x | x | 400 | 0 | 0.0% | 0.0% | 0.0% | 0 | 0.0% | 0.0% | 0.0% | 0.0% |
|     |   |  |   |   |   |   | 402 | 0 | 0.0% | 0.0% | 0.0% | 0 | 0.0% | 0.0% | 0.0% | 0.0% |
|     |   |  |   |   |   |   | 404 | 0 | 0.0% | 0.0% | 0.0% | 0 | 0.0% | 0.0% | 0.0% | 0.0% |
|     |   |  |   |   |   |   | 406 | 0 | 0.0% | 0.0% | 0.0% | 0 | 0.0% | 0.0% | 0.0% | 0.0% |
|     |   |  |   |   |   |   | 408 | 0 | 0.0% | 0.0% | 0.0% | 0 | 0.0% | 0.0% | 0.0% | 0.0% |
|     |   |  |   |   |   |   | 410 | 0 | 0.0% | 0.0% | 0.0% | 0 | 0.0% | 0.0% | 0.0% | 0.0% |
|     |   |  |   |   |   |   | 412 | 0 | 0.0% | 0.0% | 0.0% | 0 | 0.0% | 0.0% | 0.0% | 0.0% |
|     |   |  |   |   |   |   | 414 | 0 | 0.0% | 0.0% | 0.0% | 0 | 0.0% | 0.0% | 0.0% | 0.0% |
|     |   |  |   |   |   |   | 416 | 0 | 0.0% | 0.0% | 0.0% | 0 | 0.0% | 0.0% | 0.0% | 0.0% |
|     |   |  |   |   |   |   | 418 | 0 | 0.0% | 0.0% | 0.0% | 0 | 0.0% | 0.0% | 0.0% | 0.0% |
|     |   |  |   |   |   |   | 420 | 0 | 0.0% | 0.0% | 0.0% | 0 | 0.0% | 0.0% | 0.0% | 0.0% |
|     |   |  |   |   |   |   | 422 | 0 | 0.0% | 0.0% | 0.0% | 0 | 0.0% | 0.0% | 0.0% | 0.0% |
|     |   |  |   |   |   |   | 424 | 0 | 0.0% | 0.0% | 0.0% | 0 | 0.0% | 0.0% | 0.0% | 0.0% |
|     |   |  |   |   |   |   | 426 | 0 | 0.0% | 0.0% | 0.0% | 0 | 0.0% | 0.0% | 0.0% | 0.0% |
|     |   |  |   |   |   |   | 428 | 0 | 0.0% | 0.0% | 0.0% | 0 | 0.0% | 0.0% | 0.0% | 0.0% |
|     |   |  |   |   |   |   | 430 | 0 | 0.0% | 0.0% | 0.0% | 0 | 0.0% | 0.0% | 0.0% | 0.0% |
|     |   |  |   |   |   |   | 432 | 0 | 0.0% | 0.0% | 0.0% | 0 | 0.0% | 0.0% | 0.0% | 0.0% |
|     |   |  |   |   |   |   | 434 | 0 | 0.0% | 0.0% | 0.0% | 0 | 0.0% | 0.0% | 0.0% | 0.0% |
|     |   |  |   |   |   |   | 436 | 0 | 0.0% | 0.0% | 0.0% | 0 | 0.0% | 0.0% | 0.0% | 0.0% |
|     |   |  |   |   |   |   | 438 | 0 | 0.0% | 0.0% | 0.0% | 0 | 0.0% | 0.0% | 0.0% | 0.0% |
|     |   |  |   |   |   |   | 440 | 0 | 0.0% | 0.0% | 0.0% | 0 | 0.0% | 0.0% | 0.0% | 0.0% |
|     |   |  |   |   |   |   | 442 | 0 | 0.0% | 0.0% | 0.0% | 0 | 0.0% | 0.0% | 0.0% | 0.0% |
|     |   |  |   |   |   |   | 444 | 0 | 0.0% | 0.0% | 0.0% | 0 | 0.0% | 0.0% | 0.0% | 0.0% |
|     |   |  |   |   |   |   | 446 | 0 | 0.0% | 0.0% | 0.0% | 0 | 0.0% | 0.0% | 0.0% | 0.0% |
|     |   |  |   |   |   |   | 448 | 0 | 0.0% | 0.0% | 0.0% | 0 | 0.0% | 0.0% | 0.0% | 0.0% |
|     |   |  |   |   |   |   | 450 | 0 | 0.0% | 0.0% | 0.0% | 0 | 0.0% | 0.0% | 0.0% | 0.0% |
|     |   |  |   |   |   |   | 452 | 0 | 0.0% | 0.0% | 0.0% | 0 | 0.0% | 0.0% | 0.0% | 0.0% |
|     |   |  |   |   |   |   | 454 | 0 | 0.0% | 0.0% | 0.0% | 0 | 0.0% | 0.0% | 0.0% | 0.0% |
|     |   |  |   |   |   |   | 456 | 0 | 0.0% | 0.0% | 0.0% | 0 | 0.0% | 0.0% | 0.0% | 0.0% |
|     |   |  |   |   |   |   | 458 | 0 | 0.0% | 0.0% | 0.0% | 0 | 0.0% | 0.0% | 0.0% | 0.0% |
|     |   |  |   |   |   |   | 460 | 0 | 0.0% | 0.0% | 0.0% | 0 | 0.0% | 0.0% | 0.0% | 0.0% |
|     |   |  |   |   |   |   | 462 | 0 | 0.0% | 0.0% | 0.0% | 0 | 0.0% | 0.0% | 0.0% | 0.0% |
|     |   |  |   |   |   |   | 464 | 0 | 0.0% | 0.0% | 0.0% | 0 | 0.0% | 0.0% | 0.0% | 0.0% |
|     |   |  |   |   |   |   | 466 | 0 | 0.0% | 0.0% | 0.0% | 0 | 0.0% | 0.0% | 0.0% | 0.0% |
|     |   |  |   |   |   |   | 468 | 0 | 0.0% | 0.0% | 0.0% | 0 | 0.0% | 0.0% | 0.0% | 0.0% |
|     |   |  |   |   |   |   | 470 | 0 | 0.0% | 0.0% | 0.0% | 0 | 0.0% | 0.0% | 0.0% | 0.0% |
|     |   |  |   |   |   |   | 472 | 0 | 0.0% | 0.0% | 0.0% | 0 | 0.0% | 0.0% | 0.0% | 0.0% |
|     |   |  |   |   |   |   | 474 | 0 | 0.0% | 0.0% | 0.0% | 0 | 0.0% | 0.0% | 0.0% | 0.0% |
|     |   |  |   |   |   |   | 476 | 0 | 0.0% | 0.0% | 0.0% | 0 | 0.0% | 0.0% | 0.0% | 0.0% |
|     |   |  |   |   |   |   | 478 | 0 | 0.0% | 0.0% | 0.0% | 0 | 0.0% | 0.0% | 0.0% | 0.0% |
|     |   |  |   |   |   |   | 480 | 0 | 0.0% | 0.0% | 0.0% | 0 | 0.0% | 0.0% | 0.0% | 0.0% |
|     |   |  |   |   |   |   | 482 | 0 | 0.0% | 0.0% | 0.0% | 0 | 0.0% | 0.0% | 0.0% | 0.0% |
|     |   |  |   |   |   |   | 484 | 0 | 0.0% | 0.0% | 0.0% | 0 | 0.0% | 0.0% | 0.0% | 0.0% |
|     |   |  |   |   |   |   | 486 | 0 | 0.0% | 0.0% | 0.0% | 0 | 0.0% | 0.0% | 0.0% | 0.0% |
|     |   |  |   |   |   |   | 488 | 0 | 0.0% | 0.0% | 0.0% | 0 | 0.0% | 0.0% | 0.0% | 0.0% |
|     |   |  |   |   |   |   | 490 | 0 | 0.0% | 0.0% | 0.0% | 0 | 0.0% | 0.0% | 0.0% | 0.0% |
|     |   |  |   |   |   |   | 492 | 0 | 0.0% | 0.0% | 0.0% | 0 | 0.0% | 0.0% | 0.0% | 0.0% |
|     |   |  |   |   |   |   | 494 | 0 | 0.0% | 0.0% | 0.0% | 0 | 0.0% | 0.0% | 0.0% | 0.0% |
|     |   |  |   |   |   |   | 496 | 0 | 0.0% | 0.0% | 0.0% | 0 | 0.0% | 0.0% | 0.0% | 0.0% |
|     |   |  |   |   |   |   | 498 | 0 | 0.0% | 0.0% | 0.0% | 0 | 0.0% | 0.0% | 0.0% | 0.0% |
|     |   |  |   |   |   |   | 500 | 0 | 0.0% | 0.0% | 0.0% | 0 | 0.0% | 0.0% | 0.0% | 0.0% |
|     |   |  |   |   |   |   | 502 | 0 | 0.0% | 0.0% | 0.0% | 0 | 0.0% | 0.0% | 0.0% | 0.0% |
|     |   |  |   |   |   |   | 504 | 0 | 0.0% | 0.0% | 0.0% | 0 | 0.0% | 0.0% | 0.0% | 0.0% |
|     |   |  |   |   |   |   | 506 | 0 | 0.0% | 0.0% | 0.0% | 0 | 0.0% | 0.0% | 0.0% | 0.0% |
|     |   |  |   |   |   |   | 508 | 0 | 0.0% | 0.0% | 0.0% | 0 | 0.0% | 0.0% | 0.0% | 0.0% |
|     |   |  |   |   |   |   | 510 | 0 | 0.0% | 0.0% | 0.0% | 0 | 0.0% | 0.0% | 0.0% | 0.0% |
|     |   |  |   |   |   |   | 512 | 0 | 0.0% | 0.0% | 0.0% | 0 | 0.0% | 0.0% | 0.0% | 0.0% |
|     |   |  |   |   |   |   | 514 | 0 | 0.0% | 0.0% | 0.0% | 0 | 0.0% | 0.0% | 0.0% | 0.0% |
|     |   |  |   |   |   |   | 516 | 0 | 0.0% | 0.0% | 0.0% | 0 | 0.0% | 0.0% | 0.0% | 0.0% |
|     |   |  |   |   |   |   | 518 | 0 | 0.0% | 0.0% | 0.0% | 0 | 0.0% | 0.0% | 0.0% | 0.0% |
|     |   |  |   |   |   |   | 520 | 0 | 0.0% | 0.0% | 0.0% | 0 | 0.0% | 0.0% | 0.0% | 0.0% |
|     |   |  |   |   |   |   | 522 | 0 | 0.0% | 0.0% | 0.0% | 0 | 0.0% | 0.0% | 0.0% | 0.0% |
|     |   |  |   |   |   |   | 524 | 0 | 0.0% | 0.0% | 0.0% | 0 | 0.0% | 0.0% | 0.0% | 0.0% |
|     |   |  |   |   |   |   | 526 | 0 | 0.0% | 0.0% | 0.0% | 0 | 0.0% | 0.0% | 0.0% | 0.0% |
|     |   |  |   |   |   |   | 528 | 0 | 0.0% | 0.0% | 0.0% | 0 | 0.0% | 0.0% | 0.0% | 0.0% |
|     |   |  |   |   |   |   | 530 | 0 | 0.0% | 0.0% | 0.0% | 0 | 0.0% | 0.0% | 0.0% | 0.0% |
|     |   |  |   |   |   |   | 532 | 0 | 0.0% | 0.0% | 0.0% | 0 | 0.0% | 0.0% | 0.0% | 0.0% |
|     |   |  |   |   |   |   | 534 | 0 | 0.0% | 0.0% | 0.0% | 0 | 0.0% | 0.0% | 0.0% | 0.0% |
|     |   |  |   |   |   |   | 536 | 0 | 0.0% | 0.0% | 0.0% | 0 | 0.0% | 0.0% | 0.0% | 0.0% |
|     |   |  |   |   |   |   | 538 | 0 | 0.0% | 0.0% | 0.0% | 0 | 0.0% | 0.0% | 0.0% | 0.0% |
|     |   |  |   |   |   |   | 540 | 0 | 0.0% | 0.0% | 0.0% | 0 | 0.0% | 0.0% | 0.0% | 0.0% |
|     |   |  |   |   |   |   | 542 | 0 | 0.0% | 0.0% | 0.0% | 0 | 0.0% | 0.0% | 0.0% | 0.0% |
|     |   |  |   |   |   |   | 544 | 0 | 0.0% | 0.0% | 0.0% | 0 | 0.0% | 0.0% | 0.0% | 0.0% |
|     |   |  |   |   |   |   | 546 | 0 | 0.0% | 0.0% | 0.0% | 0 | 0.0% | 0.0% | 0.0% | 0.0% |
|     |   |  |   |   |   |   | 548 | 0 | 0.0% | 0.0% | 0.0% | 0 | 0.0% | 0.0% | 0.0% | 0.0% |
|     |   |  |   |   |   |   | 550 | 0 | 0.0% | 0.0% | 0.0% | 0 | 0.0% | 0.0% | 0.0% | 0.0% |
|     |   |  |   |   |   |   | 552 | 0 | 0.0% | 0.0% | 0.0% | 0 | 0.0% | 0.0% | 0.0% | 0.0% |
|     |   |  |   |   |   |   | 554 | 0 | 0.0% | 0.0% | 0.0% | 0 | 0.0% | 0.0% | 0.0% | 0.0% |
|     |   |  |   |   |   |   | 556 | 0 | 0.0% | 0.0% | 0.0% | 0 | 0.0% | 0.0% | 0.0% | 0.0% |
|     |   |  |   |   |   |   | 558 | 0 | 0.0% | 0.0% | 0.0% | 0 | 0.0% | 0.0% | 0.0% | 0.0% |
|     |   |  |   |   |   |   | 560 | 0 | 0.0% | 0.0% | 0.0% | 0 | 0.0% | 0.0% | 0.0% | 0.0% |



[illegible]

[illegible]

[illegible]



|      |   |       |      |      |   |      |      |      |      |
|------|---|-------|------|------|---|------|------|------|------|
| 1370 | 0 | 8.7%  | 0.0% | 0.2% | 0 | 0.1% | 0.0% | 0.0% | 0.00 |
| 1372 | 0 | 9.0%  | 0.0% | 0.2% | 0 | 0.1% | 0.0% | 0.0% | 0.00 |
| 1374 | 0 | 9.3%  | 0.0% | 0.2% | 0 | 0.1% | 0.0% | 0.0% | 0.00 |
| 1376 | 0 | 9.6%  | 0.0% | 0.2% | 0 | 0.1% | 0.0% | 0.0% | 0.00 |
| 1378 | 0 | 9.9%  | 0.0% | 0.2% | 0 | 0.1% | 0.0% | 0.0% | 0.00 |
| 1380 | 0 | 10.2% | 0.0% | 0.2% | 0 | 0.1% | 0.0% | 0.0% | 0.00 |
| 1382 | 0 | 10.5% | 0.0% | 0.2% | 0 | 0.1% | 0.0% | 0.0% | 0.00 |
| 1384 | 0 | 10.8% | 0.0% | 0.2% | 0 | 0.1% | 0.0% | 0.0% | 0.00 |
| 1386 | 0 | 11.2% | 0.0% | 0.2% | 0 | 0.1% | 0.0% | 0.0% | 0.00 |
| 1388 | 0 | 11.5% | 0.0% | 0.2% | 0 | 0.1% | 0.0% | 0.0% | 0.00 |
| 1390 | 0 | 11.9% | 0.0% | 0.2% | 0 | 0.1% | 0.0% | 0.0% | 0.00 |
| 1392 | 0 | 12.2% | 0.0% | 0.2% | 0 | 0.1% | 0.0% | 0.0% | 0.00 |
| 1394 | 0 | 12.6% | 0.0% | 0.3% | 0 | 0.1% | 0.0% | 0.0% | 0.00 |
| 1396 | 0 | 12.9% | 0.0% | 0.3% | 0 | 0.1% | 0.0% | 0.0% | 0.00 |
| 1398 | 0 | 13.3% | 0.0% | 0.3% | 0 | 0.1% | 0.0% | 0.0% | 0.00 |
| 1400 | 0 | 13.7% | 0.0% | 0.3% | 0 | 0.1% | 0.0% | 0.0% | 0.00 |
| 1402 | 0 | 14.1% | 0.0% | 0.3% | 0 | 0.1% | 0.0% | 0.0% | 0.00 |
| 1404 | 0 | 14.4% | 0.0% | 0.3% | 0 | 0.1% | 0.0% | 0.0% | 0.00 |
| 1406 | 0 | 14.8% | 0.0% | 0.3% | 0 | 0.1% | 0.0% | 0.0% | 0.00 |
| 1408 | 0 | 15.2% | 0.0% | 0.3% | 0 | 0.1% | 0.0% | 0.0% | 0.00 |
| 1410 | 0 | 15.6% | 0.0% | 0.3% | 0 | 0.1% | 0.0% | 0.0% | 0.00 |
| 1412 | 0 | 16.0% | 0.0% | 0.3% | 0 | 0.2% | 0.0% | 0.0% | 0.00 |
| 1414 | 0 | 16.4% | 0.0% | 0.3% | 0 | 0.2% | 0.0% | 0.0% | 0.00 |
| 1416 | 0 | 16.9% | 0.0% | 0.3% | 0 | 0.2% | 0.0% | 0.0% | 0.00 |
| 1418 | 0 | 17.3% | 0.0% | 0.3% | 0 | 0.2% | 0.0% | 0.0% | 0.00 |
| 1420 | 0 | 17.7% | 0.0% | 0.4% | 0 | 0.2% | 0.0% | 0.0% | 0.00 |
| 1422 | 0 | 18.1% | 0.0% | 0.4% | 0 | 0.2% | 0.0% | 0.0% | 0.00 |
| 1424 | 0 | 18.5% | 0.0% | 0.4% | 0 | 0.2% | 0.0% | 0.0% | 0.00 |
| 1426 | 0 | 19.0% | 0.0% | 0.4% | 0 | 0.2% | 0.0% | 0.0% | 0.00 |
| 1428 | 0 | 19.4% | 0.0% | 0.4% | 0 | 0.2% | 0.0% | 0.0% | 0.00 |
| 1430 | 0 | 19.8% | 0.0% | 0.4% | 0 | 0.2% | 0.0% | 0.0% | 0.00 |
| 1432 | 0 | 20.3% | 0.0% | 0.4% | 0 | 0.2% | 0.0% | 0.0% | 0.00 |
| 1434 | 0 | 20.7% | 0.0% | 0.4% | 0 | 0.2% | 0.0% | 0.0% | 0.00 |
| 1436 | 0 | 21.2% | 0.0% | 0.4% | 0 | 0.2% | 0.0% | 0.0% | 0.00 |
| 1438 | 0 | 21.6% | 0.0% | 0.4% | 0 | 0.2% | 0.0% | 0.0% | 0.00 |
| 1440 | 0 | 22.1% | 0.0% | 0.4% | 0 | 0.2% | 0.0% | 0.0% | 0.00 |
| 1442 | 0 | 22.5% | 0.0% | 0.5% | 0 | 0.2% | 0.0% | 0.0% | 0.00 |
| 1444 | 0 | 22.9% | 0.0% | 0.5% | 0 | 0.3% | 0.0% | 0.0% | 0.00 |
| 1446 | 0 | 23.4% | 0.0% | 0.5% | 0 | 0.3% | 0.0% | 0.0% | 0.00 |
| 1448 | 0 | 23.8% | 0.0% | 0.5% | 0 | 0.3% | 0.0% | 0.0% | 0.00 |
| 1450 | 0 | 24.3% | 0.0% | 0.5% | 0 | 0.3% | 0.0% | 0.0% | 0.00 |
| 1452 | 0 | 24.7% | 0.0% | 0.5% | 0 | 0.3% | 0.0% | 0.0% | 0.00 |
| 1454 | 0 | 25.2% | 0.0% | 0.5% | 0 | 0.3% | 0.0% | 0.0% | 0.00 |
| 1456 | 0 | 25.6% | 0.0% | 0.5% | 0 | 0.3% | 0.0% | 0.0% | 0.01 |
| 1458 | 0 | 26.1% | 0.0% | 0.5% | 0 | 0.3% | 0.0% | 0.0% | 0.01 |
| 1460 | 0 | 26.5% | 0.0% | 0.5% | 0 | 0.3% | 0.0% | 0.0% | 0.01 |
| 1462 | 0 | 26.9% | 0.0% | 0.5% | 0 | 0.3% | 0.0% | 0.0% | 0.01 |
| 1464 | 0 | 27.4% | 0.0% | 0.5% | 0 | 0.3% | 0.0% | 0.0% | 0.01 |
| 1466 | 0 | 27.8% | 0.0% | 0.6% | 0 | 0.4% | 0.0% | 0.0% | 0.01 |
| 1468 | 0 | 28.2% | 0.0% | 0.6% | 0 | 0.4% | 0.0% | 0.0% | 0.01 |
| 1470 | 0 | 28.6% | 0.0% | 0.6% | 0 | 0.4% | 0.0% | 0.0% | 0.01 |
| 1472 | 0 | 29.1% | 0.0% | 0.6% | 0 | 0.4% | 0.0% | 0.0% | 0.01 |
| 1474 | 0 | 29.5% | 0.0% | 0.6% | 0 | 0.4% | 0.0% | 0.0% | 0.01 |
| 1476 | 0 | 29.9% | 0.0% | 0.6% | 0 | 0.4% | 0.0% | 0.0% | 0.01 |
| 1478 | 0 | 30.3% | 0.0% | 0.6% | 0 | 0.4% | 0.0% | 0.0% | 0.01 |
| 1480 | 0 | 30.7% | 0.0% | 0.6% | 0 | 0.4% | 0.0% | 0.0% | 0.01 |
| 1482 | 0 | 31.1% | 0.0% | 0.6% | 0 | 0.4% | 0.0% | 0.0% | 0.01 |
| 1484 | 0 | 31.4% | 0.0% | 0.6% | 0 | 0.5% | 0.0% | 0.0% | 0.01 |
| 1486 | 0 | 31.8% | 0.0% | 0.6% | 0 | 0.5% | 0.0% | 0.0% | 0.01 |
| 1488 | 0 | 32.2% | 0.0% | 0.6% | 0 | 0.5% | 0.0% | 0.0% | 0.01 |
| 1490 | 0 | 32.5% | 0.0% | 0.7% | 0 | 0.5% | 0.0% | 0.0% | 0.01 |
| 1492 | 0 | 32.9% | 0.0% | 0.7% | 0 | 0.5% | 0.0% | 0.0% | 0.01 |
| 1494 | 0 | 33.2% | 0.0% | 0.7% | 0 | 0.5% | 0.0% | 0.0% | 0.01 |
| 1496 | 0 | 33.6% | 0.0% | 0.7% | 0 | 0.5% | 0.0% | 0.0% | 0.01 |
| 1498 | 0 | 33.9% | 0.0% | 0.7% | 0 | 0.6% | 0.0% | 0.0% | 0.01 |
| 1500 | 1 | 34.2% | 1.0% | 0.7% | 0 | 0.6% | 0.0% | 0.0% | 0.01 |
| 1502 | 2 | 34.5% | 2.0% | 0.7% | 0 | 0.6% | 0.0% | 0.0% | 0.01 |
| 1504 | 2 | 34.8% | 2.0% | 0.7% | 0 | 0.6% | 0.0% | 0.0% | 0.01 |
| 1506 | 2 | 35.1% | 2.0% | 0.7% | 0 | 0.6% | 0.0% | 0.0% | 0.01 |
| 1508 | 2 | 35.4% | 2.0% | 0.7% | 0 | 0.6% | 0.0% | 0.0% | 0.01 |
| 1510 | 2 | 35.6% | 2.0% | 0.7% | 0 | 0.6% | 0.0% | 0.0% | 0.01 |
| 1512 | 2 | 35.9% | 2.0% | 0.7% | 0 | 0.7% | 0.0% | 0.0% | 0.01 |
| 1514 | 2 | 36.1% | 2.0% | 0.7% | 0 | 0.7% | 0.0% | 0.0% | 0.01 |
| 1516 | 2 | 36.4% | 2.0% | 0.7% | 0 | 0.7% | 0.0% | 0.0% | 0.01 |
| 1518 | 2 | 36.6% | 2.0% | 0.7% | 0 | 0.7% | 0.0% | 0.0% | 0.01 |
| 1520 | 2 | 36.8% | 2.0% | 0.7% | 0 | 0.7% | 0.0% | 0.0% | 0.01 |
| 1522 | 2 | 37.0% | 2.0% | 0.7% | 0 | 0.8% | 0.0% | 0.0% | 0.01 |
| 1524 | 2 | 37.2% | 2.0% | 0.7% | 0 | 0.8% | 0.0% | 0.0% | 0.01 |
| 1526 | 2 | 37.3% | 2.0% | 0.7% | 0 | 0.8% | 0.0% | 0.0% | 0.01 |
| 1528 | 2 | 37.5% | 2.0% | 0.7% | 0 | 0.8% | 0.0% | 0.0% | 0.01 |
| 1530 | 2 | 37.6% | 2.0% | 0.8% | 0 | 0.8% | 0.0% | 0.0% | 0.01 |
| 1532 | 2 | 37.8% | 2.0% | 0.8% | 0 | 0.9% | 0.0% | 0.0% | 0.01 |
| 1534 | 2 | 37.9% | 2.0% | 0.8% | 0 | 0.9% | 0.0% | 0.0% | 0.01 |
| 1536 | 2 | 38.0% | 2.0% | 0.8% | 0 | 0.9% | 0.0% | 0.0% | 0.01 |
| 1538 | 2 | 38.1% | 2.0% | 0.8% | 0 | 0.9% | 0.0% | 0.0% | 0.01 |
| 1540 | 2 | 38.1% | 2.0% | 0.8% | 0 | 1.0% | 0.0% | 0.0% | 0.01 |
| 1542 | 2 | 38.2% | 2.0% | 0.8% | 0 | 1.0% | 0.0% | 0.0% | 0.01 |
| 1544 | 2 | 38.2% | 2.0% | 0.8% | 0 | 1.0% | 0.0% | 0.0% | 0.01 |
| 1546 | 2 | 38.3% | 2.0% | 0.8% | 0 | 1.0% | 0.0% | 0.0% | 0.01 |
| 1548 | 2 | 38.3% | 2.0% | 0.8% | 0 | 1.1% | 0.0% | 0.0% | 0.01 |
| 1550 | 2 | 38.3% | 2.0% | 0.8% | 0 | 1.1% | 0.0% | 0.0% | 0.01 |
| 1552 | 2 | 38.3% | 2.0% | 0.8% | 0 | 1.1% | 0.0% | 0.0% | 0.01 |
| 1554 | 2 | 38.3% | 2.0% | 0.8% | 0 | 1.2% | 0.0% | 0.0% | 0.01 |
| 1556 | 2 | 38.2% | 2.0% | 0.8% | 0 | 1.2% | 0.0% | 0.0% | 0.01 |
| 1558 | 2 | 38.2% | 2.0% | 0.8% | 0 | 1.2% | 0.0% | 0.0% | 0.01 |
| 1560 | 2 | 38.1% | 2.0% | 0.8% | 0 | 1.2% | 0.0% | 0.0% | 0.01 |
| 1562 | 2 | 38.0% | 2.0% | 0.8% | 0 | 1.3% | 0.0% | 0.0% | 0.01 |
| 1564 | 2 | 37.9% | 2.0% | 0.8% | 0 | 1.3% | 0.0% | 0.0% | 0.01 |
| 1566 | 2 | 37.8% | 2.0% | 0.8% | 0 | 1.3% | 0.0% | 0.0% | 0.01 |
| 1568 | 2 | 37.7% | 2.0% | 0.8% | 0 | 1.4% | 0.0% | 0.0% | 0.01 |
| 1570 | 2 | 37.6% | 2.0% | 0.8% | 0 | 1.4% | 0.0% | 0.0% | 0.01 |

|      |   |       |      |      |   |      |      |      |      |
|------|---|-------|------|------|---|------|------|------|------|
| 1572 | 2 | 37.4% | 2.0% | 0.7% | 0 | 1.4% | 0.0% | 0.0% | 0.01 |
| 1574 | 2 | 37.3% | 2.0% | 0.7% | 0 | 1.5% | 0.0% | 0.0% | 0.01 |
| 1576 | 2 | 37.1% | 2.0% | 0.7% | 0 | 1.5% | 0.0% | 0.0% | 0.01 |
| 1578 | 2 | 36.9% | 2.0% | 0.7% | 0 | 1.5% | 0.0% | 0.0% | 0.01 |
| 1580 | 2 | 36.7% | 2.0% | 0.7% | 0 | 1.6% | 0.0% | 0.0% | 0.01 |
| 1582 | 2 | 36.5% | 2.0% | 0.7% | 0 | 1.6% | 0.0% | 0.0% | 0.01 |
| 1584 | 2 | 36.3% | 2.0% | 0.7% | 0 | 1.7% | 0.0% | 0.0% | 0.01 |
| 1586 | 2 | 36.0% | 2.0% | 0.7% | 0 | 1.7% | 0.0% | 0.0% | 0.01 |
| 1588 | 2 | 35.8% | 2.0% | 0.7% | 0 | 1.7% | 0.0% | 0.0% | 0.01 |
| 1590 | 2 | 35.5% | 2.0% | 0.7% | 0 | 1.8% | 0.0% | 0.0% | 0.01 |
| 1592 | 2 | 35.2% | 2.0% | 0.7% | 0 | 1.8% | 0.0% | 0.0% | 0.01 |
| 1594 | 2 | 35.0% | 2.0% | 0.7% | 0 | 1.9% | 0.0% | 0.0% | 0.01 |
| 1596 | 2 | 34.7% | 2.0% | 0.7% | 0 | 1.9% | 0.0% | 0.0% | 0.01 |
| 1598 | 2 | 34.4% | 2.0% | 0.7% | 0 | 1.9% | 0.0% | 0.0% | 0.01 |
| 1600 | 1 | 34.1% | 1.0% | 0.7% | 0 | 2.0% | 0.0% | 0.0% | 0.01 |
| 1602 | 0 | 33.7% | 0.0% | 0.7% | 0 | 2.0% | 0.0% | 0.0% | 0.01 |
| 1604 | 0 | 33.4% | 0.0% | 0.7% | 0 | 2.1% | 0.0% | 0.0% | 0.01 |
| 1606 | 0 | 33.1% | 0.0% | 0.7% | 0 | 2.1% | 0.0% | 0.0% | 0.01 |
| 1608 | 0 | 32.7% | 0.0% | 0.7% | 0 | 2.2% | 0.0% | 0.0% | 0.01 |
| 1610 | 0 | 32.4% | 0.0% | 0.6% | 0 | 2.2% | 0.0% | 0.0% | 0.01 |
| 1612 | 0 | 32.0% | 0.0% | 0.6% | 0 | 2.3% | 0.0% | 0.0% | 0.01 |
| 1614 | 0 | 31.6% | 0.0% | 0.6% | 0 | 2.3% | 0.0% | 0.0% | 0.01 |
| 1616 | 0 | 31.2% | 0.0% | 0.6% | 0 | 2.4% | 0.0% | 0.0% | 0.01 |
| 1618 | 0 | 30.9% | 0.0% | 0.6% | 0 | 2.4% | 0.0% | 0.0% | 0.01 |
| 1620 | 0 | 30.5% | 0.0% | 0.6% | 0 | 2.5% | 0.0% | 0.0% | 0.01 |
| 1622 | 0 | 30.1% | 0.0% | 0.6% | 0 | 2.5% | 0.0% | 0.0% | 0.01 |
| 1624 | 0 | 29.7% | 0.0% | 0.6% | 0 | 2.6% | 0.0% | 0.0% | 0.01 |
| 1626 | 0 | 29.3% | 0.0% | 0.6% | 0 | 2.6% | 0.0% | 0.0% | 0.01 |
| 1628 | 0 | 28.8% | 0.0% | 0.6% | 0 | 2.7% | 0.0% | 0.0% | 0.01 |
| 1630 | 0 | 28.4% | 0.0% | 0.6% | 0 | 2.8% | 0.0% | 0.0% | 0.01 |
| 1632 | 0 | 28.0% | 0.0% | 0.6% | 0 | 2.8% | 0.0% | 0.0% | 0.01 |
| 1634 | 0 | 27.6% | 0.0% | 0.6% | 0 | 2.9% | 0.0% | 0.0% | 0.01 |
| 1636 | 0 | 27.1% | 0.0% | 0.5% | 0 | 2.9% | 0.0% | 0.0% | 0.01 |
| 1638 | 0 | 26.7% | 0.0% | 0.5% | 0 | 3.0% | 0.0% | 0.0% | 0.00 |
| 1640 | 0 | 26.3% | 0.0% | 0.5% | 0 | 3.1% | 0.0% | 0.0% | 0.00 |
| 1642 | 0 | 25.8% | 0.0% | 0.5% | 0 | 3.1% | 0.0% | 0.0% | 0.00 |
| 1644 | 0 | 25.4% | 0.0% | 0.5% | 0 | 3.2% | 0.0% | 0.0% | 0.00 |
| 1646 | 0 | 25.0% | 0.0% | 0.5% | 0 | 3.3% | 0.0% | 0.0% | 0.00 |
| 1648 | 0 | 24.5% | 0.0% | 0.5% | 0 | 3.3% | 0.0% | 0.0% | 0.00 |
| 1650 | 0 | 24.1% | 0.0% | 0.5% | 0 | 3.4% | 0.0% | 0.0% | 0.00 |
| 1652 | 0 | 23.6% | 0.0% | 0.5% | 0 | 3.5% | 0.0% | 0.0% | 0.00 |
| 1654 | 0 | 23.2% | 0.0% | 0.5% | 0 | 3.5% | 0.0% | 0.0% | 0.00 |
| 1656 | 0 | 22.7% | 0.0% | 0.5% | 0 | 3.6% | 0.0% | 0.0% | 0.00 |
| 1658 | 0 | 22.3% | 0.0% | 0.4% | 0 | 3.7% | 0.0% | 0.0% | 0.00 |
| 1660 | 0 | 21.8% | 0.0% | 0.4% | 0 | 3.8% | 0.0% | 0.1% | 0.00 |
| 1662 | 0 | 21.4% | 0.0% | 0.4% | 0 | 3.8% | 0.0% | 0.1% | 0.00 |
| 1664 | 0 | 20.9% | 0.0% | 0.4% | 0 | 3.9% | 0.0% | 0.1% | 0.00 |
| 1666 | 0 | 20.5% | 0.0% | 0.4% | 0 | 4.0% | 0.0% | 0.1% | 0.00 |
| 1668 | 0 | 20.1% | 0.0% | 0.4% | 0 | 4.1% | 0.0% | 0.1% | 0.00 |
| 1670 | 0 | 19.6% | 0.0% | 0.4% | 0 | 4.1% | 0.0% | 0.1% | 0.00 |
| 1672 | 0 | 19.2% | 0.0% | 0.4% | 0 | 4.2% | 0.0% | 0.1% | 0.00 |
| 1674 | 0 | 18.8% | 0.0% | 0.4% | 0 | 4.3% | 0.0% | 0.1% | 0.00 |
| 1676 | 0 | 18.3% | 0.0% | 0.4% | 0 | 4.4% | 0.0% | 0.1% | 0.00 |
| 1678 | 0 | 17.9% | 0.0% | 0.4% | 0 | 4.5% | 0.0% | 0.1% | 0.00 |
| 1680 | 0 | 17.5% | 0.0% | 0.3% | 0 | 4.6% | 0.0% | 0.1% | 0.00 |
| 1682 | 0 | 17.1% | 0.0% | 0.3% | 0 | 4.6% | 0.0% | 0.1% | 0.00 |
| 1684 | 0 | 16.7% | 0.0% | 0.3% | 0 | 4.7% | 0.0% | 0.1% | 0.00 |
| 1686 | 0 | 16.2% | 0.0% | 0.3% | 0 | 4.8% | 0.0% | 0.1% | 0.00 |
| 1688 | 0 | 15.8% | 0.0% | 0.3% | 0 | 4.9% | 0.0% | 0.1% | 0.00 |
| 1690 | 0 | 15.4% | 0.0% | 0.3% | 0 | 5.0% | 0.0% | 0.1% | 0.00 |
| 1692 | 0 | 15.0% | 0.0% | 0.3% | 0 | 5.1% | 0.0% | 0.1% | 0.00 |
| 1694 | 0 | 14.6% | 0.0% | 0.3% | 0 | 5.2% | 0.0% | 0.1% | 0.00 |
| 1696 | 0 | 14.3% | 0.0% | 0.3% | 0 | 5.3% | 0.0% | 0.1% | 0.00 |
| 1698 | 0 | 13.9% | 0.0% | 0.3% | 0 | 5.4% | 0.0% | 0.1% | 0.00 |
| 1700 | 0 | 13.5% | 0.0% | 0.3% | 0 | 5.5% | 0.0% | 0.1% | 0.00 |
| 1702 | 0 | 13.1% | 0.0% | 0.3% | 0 | 5.6% | 0.0% | 0.1% | 0.00 |
| 1704 | 0 | 12.8% | 0.0% | 0.3% | 0 | 5.7% | 0.0% | 0.1% | 0.00 |
| 1706 | 0 | 12.4% | 0.0% | 0.2% | 0 | 5.8% | 0.0% | 0.1% | 0.00 |
| 1708 | 0 | 12.0% | 0.0% | 0.2% | 0 | 5.9% | 0.0% | 0.1% | 0.00 |
| 1710 | 0 | 11.7% | 0.0% | 0.2% | 0 | 6.0% | 0.0% | 0.1% | 0.00 |
| 1712 | 0 | 11.4% | 0.0% | 0.2% | 0 | 6.1% | 0.0% | 0.1% | 0.00 |
| 1714 | 0 | 11.0% | 0.0% | 0.2% | 0 | 6.2% | 0.0% | 0.1% | 0.00 |
| 1716 | 0 | 10.7% | 0.0% | 0.2% | 0 | 6.3% | 0.0% | 0.1% | 0.00 |
| 1718 | 0 | 10.4% | 0.0% | 0.2% | 0 | 6.4% | 0.0% | 0.1% | 0.00 |
| 1720 | 0 | 10.0% | 0.0% | 0.2% | 0 | 6.5% | 0.0% | 0.1% | 0.00 |
| 1722 | 0 | 9.7%  | 0.0% | 0.2% | 0 | 6.6% | 0.0% | 0.1% | 0.00 |
| 1724 | 0 | 9.4%  | 0.0% | 0.2% | 0 | 6.7% | 0.0% | 0.1% | 0.00 |
| 1726 | 0 | 9.1%  | 0.0% | 0.2% | 0 | 6.9% | 0.0% | 0.1% | 0.00 |
| 1728 | 0 | 8.8%  | 0.0% | 0.2% | 0 | 7.0% | 0.0% | 0.1% | 0.00 |
| 1730 | 0 | 8.5%  | 0.0% | 0.2% | 0 | 7.1% | 0.0% | 0.1% | 0.00 |
| 1732 | 0 | 8.3%  | 0.0% | 0.2% | 0 | 7.2% | 0.0% | 0.1% | 0.00 |
| 1734 | 0 | 8.0%  | 0.0% | 0.2% | 0 | 7.3% | 0.0% | 0.1% | 0.00 |
| 1736 | 0 | 7.7%  | 0.0% | 0.2% | 0 | 7.4% | 0.0% | 0.1% | 0.00 |
| 1738 | 0 | 7.4%  | 0.0% | 0.1% | 0 | 7.6% | 0.0% | 0.1% | 0.00 |
| 1740 | 0 | 7.2%  | 0.0% | 0.1% | 0 | 7.7% | 0.0% | 0.1% | 0.00 |
| 1742 | 0 | 6.9%  | 0.0% | 0.1% | 0 | 7.8% | 0.0% | 0.1% | 0.00 |
| 1744 | 0 | 6.7%  | 0.0% | 0.1% | 0 | 7.9% | 0.0% | 0.1% | 0.00 |
| 1746 | 0 | 6.5%  | 0.0% | 0.1% | 0 | 8.1% | 0.0% | 0.1% | 0.00 |
| 1748 | 0 | 6.2%  | 0.0% | 0.1% | 0 | 8.2% | 0.0% | 0.1% | 0.00 |
| 1750 | 0 | 6.0%  | 0.0% | 0.1% | 0 | 8.3% | 0.0% | 0.1% | 0.00 |
| 1752 | 0 | 5.8%  | 0.0% | 0.1% | 0 | 8.5% | 0.0% | 0.1% | 0.00 |
| 1754 | 0 | 5.6%  | 0.0% | 0.1% | 0 | 8.6% | 0.0% | 0.1% | 0.00 |
| 1756 | 0 | 5.4%  | 0.0% | 0.1% | 0 | 8.7% | 0.0% | 0.1% | 0.00 |
| 1758 | 0 | 5.2%  | 0.0% | 0.1% | 0 | 8.8% | 0.0% | 0.1% | 0.00 |
| 1760 | 0 | 5.0%  | 0.0% | 0.1% | 0 | 9.0% | 0.0% | 0.1% | 0.00 |
| 1762 | 0 | 4.8%  | 0.0% | 0.1% | 0 | 9.1% | 0.0% | 0.1% | 0.00 |
| 1764 | 0 | 4.6%  | 0.0% | 0.1% | 0 | 9.3% | 0.0% | 0.1% | 0.00 |
| 1766 | 0 | 4.4%  | 0.0% | 0.1% | 0 | 9.4% | 0.0% | 0.1% | 0.00 |
| 1768 | 0 | 4.2%  | 0.0% | 0.1% | 0 | 9.5% | 0.0% | 0.1% | 0.00 |
| 1770 | 0 | 4.1%  | 0.0% | 0.1% | 0 | 9.7% | 0.0% | 0.1% | 0.00 |
| 1772 | 0 | 3.9%  | 0.0% | 0.1% | 0 | 9.8% | 0.0% | 0.1% | 0.00 |

|      |   |      |      |      |   |       |      |      |      |
|------|---|------|------|------|---|-------|------|------|------|
| 1774 | 0 | 3.7% | 0.0% | 0.1% | 0 | 10.0% | 0.0% | 0.1% | 0.00 |
| 1776 | 0 | 3.6% | 0.0% | 0.1% | 0 | 10.1% | 0.0% | 0.1% | 0.00 |
| 1778 | 0 | 3.4% | 0.0% | 0.1% | 0 | 10.2% | 0.0% | 0.1% | 0.00 |
| 1780 | 0 | 3.3% | 0.0% | 0.1% | 0 | 10.4% | 0.0% | 0.1% | 0.00 |
| 1782 | 0 | 3.2% | 0.0% | 0.1% | 0 | 10.5% | 0.0% | 0.1% | 0.00 |
| 1784 | 0 | 3.0% | 0.0% | 0.1% | 0 | 10.7% | 0.0% | 0.1% | 0.00 |
| 1786 | 0 | 2.9% | 0.0% | 0.1% | 0 | 10.8% | 0.0% | 0.1% | 0.00 |
| 1788 | 0 | 2.8% | 0.0% | 0.1% | 0 | 11.0% | 0.0% | 0.1% | 0.00 |
| 1790 | 0 | 2.7% | 0.0% | 0.1% | 0 | 11.1% | 0.0% | 0.1% | 0.00 |
| 1792 | 0 | 2.5% | 0.0% | 0.1% | 0 | 11.3% | 0.0% | 0.2% | 0.00 |
| 1794 | 0 | 2.4% | 0.0% | 0.0% | 0 | 11.4% | 0.0% | 0.2% | 0.00 |
| 1796 | 0 | 2.3% | 0.0% | 0.0% | 0 | 11.6% | 0.0% | 0.2% | 0.00 |
| 1798 | 0 | 2.2% | 0.0% | 0.0% | 0 | 11.7% | 0.0% | 0.2% | 0.00 |
| 1800 | 0 | 2.1% | 0.0% | 0.0% | 0 | 11.9% | 0.0% | 0.2% | 0.00 |
| 1802 | 0 | 2.0% | 0.0% | 0.0% | 0 | 12.1% | 0.0% | 0.2% | 0.00 |
| 1804 | 0 | 1.9% | 0.0% | 0.0% | 0 | 12.2% | 0.0% | 0.2% | 0.00 |
| 1806 | 0 | 1.8% | 0.0% | 0.0% | 0 | 12.4% | 0.0% | 0.2% | 0.00 |
| 1808 | 0 | 1.8% | 0.0% | 0.0% | 0 | 12.5% | 0.0% | 0.2% | 0.00 |
| 1810 | 0 | 1.7% | 0.0% | 0.0% | 0 | 12.7% | 0.0% | 0.2% | 0.00 |
| 1812 | 0 | 1.6% | 0.0% | 0.0% | 0 | 12.8% | 0.0% | 0.2% | 0.00 |
| 1814 | 0 | 1.5% | 0.0% | 0.0% | 0 | 13.0% | 0.0% | 0.2% | 0.00 |
| 1816 | 0 | 1.4% | 0.0% | 0.0% | 0 | 13.2% | 0.0% | 0.2% | 0.00 |
| 1818 | 0 | 1.4% | 0.0% | 0.0% | 0 | 13.3% | 0.0% | 0.2% | 0.00 |
| 1820 | 0 | 1.3% | 0.0% | 0.0% | 0 | 13.5% | 0.0% | 0.2% | 0.00 |
| 1822 | 0 | 1.2% | 0.0% | 0.0% | 0 | 13.7% | 0.0% | 0.2% | 0.00 |
| 1824 | 0 | 1.2% | 0.0% | 0.0% | 0 | 13.8% | 0.0% | 0.2% | 0.00 |
| 1826 | 0 | 1.1% | 0.0% | 0.0% | 0 | 14.0% | 0.0% | 0.2% | 0.00 |
| 1828 | 0 | 1.1% | 0.0% | 0.0% | 0 | 14.2% | 0.0% | 0.2% | 0.00 |
| 1830 | 0 | 1.0% | 0.0% | 0.0% | 0 | 14.3% | 0.0% | 0.2% | 0.00 |
| 1832 | 0 | 1.0% | 0.0% | 0.0% | 0 | 14.5% | 0.0% | 0.2% | 0.00 |
| 1834 | 0 | 0.9% | 0.0% | 0.0% | 0 | 14.7% | 0.0% | 0.2% | 0.00 |
| 1836 | 0 | 0.9% | 0.0% | 0.0% | 0 | 14.8% | 0.0% | 0.2% | 0.00 |
| 1838 | 0 | 0.8% | 0.0% | 0.0% | 0 | 15.0% | 0.0% | 0.2% | 0.00 |
| 1840 | 0 | 0.8% | 0.0% | 0.0% | 0 | 15.2% | 0.0% | 0.2% | 0.00 |
| 1842 | 0 | 0.7% | 0.0% | 0.0% | 0 | 15.3% | 0.0% | 0.2% | 0.00 |
| 1844 | 0 | 0.7% | 0.0% | 0.0% | 0 | 15.5% | 0.0% | 0.2% | 0.00 |
| 1846 | 0 | 0.7% | 0.0% | 0.0% | 0 | 15.7% | 0.0% | 0.2% | 0.00 |
| 1848 | 0 | 0.6% | 0.0% | 0.0% | 0 | 15.9% | 0.0% | 0.2% | 0.00 |
| 1850 | 0 | 0.6% | 0.0% | 0.0% | 0 | 16.0% | 0.0% | 0.2% | 0.00 |
| 1852 | 0 | 0.6% | 0.0% | 0.0% | 0 | 16.2% | 0.0% | 0.2% | 0.00 |
| 1854 | 0 | 0.5% | 0.0% | 0.0% | 0 | 16.4% | 0.0% | 0.2% | 0.00 |
| 1856 | 0 | 0.5% | 0.0% | 0.0% | 0 | 16.5% | 0.0% | 0.2% | 0.00 |
| 1858 | 0 | 0.5% | 0.0% | 0.0% | 0 | 16.7% | 0.0% | 0.2% | 0.00 |
| 1860 | 0 | 0.4% | 0.0% | 0.0% | 0 | 16.9% | 0.0% | 0.2% | 0.00 |
| 1862 | 0 | 0.4% | 0.0% | 0.0% | 0 | 17.1% | 0.0% | 0.2% | 0.00 |
| 1864 | 0 | 0.4% | 0.0% | 0.0% | 0 | 17.2% | 0.0% | 0.2% | 0.00 |
| 1866 | 0 | 0.4% | 0.0% | 0.0% | 0 | 17.4% | 0.0% | 0.2% | 0.00 |
| 1868 | 0 | 0.4% | 0.0% | 0.0% | 0 | 17.6% | 0.0% | 0.2% | 0.00 |
| 1870 | 0 | 0.3% | 0.0% | 0.0% | 0 | 17.8% | 0.0% | 0.2% | 0.00 |
| 1872 | 0 | 0.3% | 0.0% | 0.0% | 0 | 17.9% | 0.0% | 0.2% | 0.00 |
| 1874 | 0 | 0.3% | 0.0% | 0.0% | 0 | 18.1% | 0.0% | 0.2% | 0.00 |
| 1876 | 0 | 0.3% | 0.0% | 0.0% | 0 | 18.3% | 0.0% | 0.2% | 0.00 |
| 1878 | 0 | 0.3% | 0.0% | 0.0% | 0 | 18.4% | 0.0% | 0.2% | 0.00 |
| 1880 | 0 | 0.2% | 0.0% | 0.0% | 0 | 18.6% | 0.0% | 0.2% | 0.00 |
| 1882 | 0 | 0.2% | 0.0% | 0.0% | 0 | 18.8% | 0.0% | 0.3% | 0.00 |
| 1884 | 0 | 0.2% | 0.0% | 0.0% | 0 | 19.0% | 0.0% | 0.3% | 0.00 |
| 1886 | 0 | 0.2% | 0.0% | 0.0% | 0 | 19.1% | 0.0% | 0.3% | 0.00 |
| 1888 | 0 | 0.2% | 0.0% | 0.0% | 0 | 19.3% | 0.0% | 0.3% | 0.00 |
| 1890 | 0 | 0.2% | 0.0% | 0.0% | 0 | 19.5% | 0.0% | 0.3% | 0.00 |
| 1892 | 0 | 0.2% | 0.0% | 0.0% | 0 | 19.7% | 0.0% | 0.3% | 0.00 |
| 1894 | 0 | 0.2% | 0.0% | 0.0% | 0 | 19.8% | 0.0% | 0.3% | 0.00 |
| 1896 | 0 | 0.1% | 0.0% | 0.0% | 0 | 20.0% | 0.0% | 0.3% | 0.00 |
| 1898 | 0 | 0.1% | 0.0% | 0.0% | 0 | 20.2% | 0.0% | 0.3% | 0.00 |
| 1900 | 0 | 0.1% | 0.0% | 0.0% | 0 | 20.3% | 0.0% | 0.3% | 0.00 |
| 1902 | 0 | 0.1% | 0.0% | 0.0% | 0 | 20.5% | 0.0% | 0.3% | 0.00 |
| 1904 | 0 | 0.1% | 0.0% | 0.0% | 0 | 20.7% | 0.0% | 0.3% | 0.00 |
| 1906 | 0 | 0.1% | 0.0% | 0.0% | 0 | 20.8% | 0.0% | 0.3% | 0.00 |
| 1908 | 0 | 0.1% | 0.0% | 0.0% | 0 | 21.0% | 0.0% | 0.3% | 0.00 |
| 1910 | 0 | 0.1% | 0.0% | 0.0% | 0 | 21.2% | 0.0% | 0.3% | 0.00 |
| 1912 | 0 | 0.1% | 0.0% | 0.0% | 0 | 21.3% | 0.0% | 0.3% | 0.00 |
| 1914 | 0 | 0.1% | 0.0% | 0.0% | 0 | 21.5% | 0.0% | 0.3% | 0.00 |
| 1916 | 0 | 0.1% | 0.0% | 0.0% | 0 | 21.7% | 0.0% | 0.3% | 0.00 |
| 1918 | 0 | 0.1% | 0.0% | 0.0% | 0 | 21.8% | 0.0% | 0.3% | 0.00 |
| 1920 | 0 | 0.1% | 0.0% | 0.0% | 0 | 22.0% | 0.0% | 0.3% | 0.00 |
| 1922 | 0 | 0.1% | 0.0% | 0.0% | 0 | 22.2% | 0.0% | 0.3% | 0.00 |
| 1924 | 0 | 0.1% | 0.0% | 0.0% | 0 | 22.3% | 0.0% | 0.3% | 0.00 |
| 1926 | 0 | 0.1% | 0.0% | 0.0% | 0 | 22.5% | 0.0% | 0.3% | 0.00 |
| 1928 | 0 | 0.1% | 0.0% | 0.0% | 0 | 22.6% | 0.0% | 0.3% | 0.00 |
| 1930 | 0 | 0.0% | 0.0% | 0.0% | 0 | 22.8% | 0.0% | 0.3% | 0.00 |
| 1932 | 0 | 0.0% | 0.0% | 0.0% | 0 | 22.9% | 0.0% | 0.3% | 0.00 |
| 1934 | 0 | 0.0% | 0.0% | 0.0% | 0 | 23.1% | 0.0% | 0.3% | 0.00 |
| 1936 | 0 | 0.0% | 0.0% | 0.0% | 0 | 23.3% | 0.0% | 0.3% | 0.00 |
| 1938 | 0 | 0.0% | 0.0% | 0.0% | 0 | 23.4% | 0.0% | 0.3% | 0.00 |
| 1940 | 0 | 0.0% | 0.0% | 0.0% | 0 | 23.6% | 0.0% | 0.3% | 0.00 |
| 1942 | 0 | 0.0% | 0.0% | 0.0% | 0 | 23.7% | 0.0% | 0.3% | 0.00 |
| 1944 | 0 | 0.0% | 0.0% | 0.0% | 0 | 23.9% | 0.0% | 0.3% | 0.00 |
| 1946 | 0 | 0.0% | 0.0% | 0.0% | 0 | 24.0% | 0.0% | 0.3% | 0.00 |
| 1948 | 0 | 0.0% | 0.0% | 0.0% | 0 | 24.2% | 0.0% | 0.3% | 0.00 |
| 1950 | 0 | 0.0% | 0.0% | 0.0% | 0 | 24.3% | 0.0% | 0.3% | 0.00 |
| 1952 | 0 | 0.0% | 0.0% | 0.0% | 0 | 24.4% | 0.0% | 0.3% | 0.00 |
| 1954 | 0 | 0.0% | 0.0% | 0.0% | 0 | 24.6% | 0.0% | 0.3% | 0.00 |
| 1956 | 0 | 0.0% | 0.0% | 0.0% | 0 | 24.7% | 0.0% | 0.3% | 0.00 |
| 1958 | 0 | 0.0% | 0.0% | 0.0% | 0 | 24.9% | 0.0% | 0.3% | 0.00 |
| 1960 | 0 | 0.0% | 0.0% | 0.0% | 0 | 25.0% | 0.0% | 0.3% | 0.00 |
| 1962 | 0 | 0.0% | 0.0% | 0.0% | 0 | 25.1% | 0.0% | 0.3% | 0.00 |
| 1964 | 0 | 0.0% | 0.0% | 0.0% | 0 | 25.3% | 0.0% | 0.3% | 0.00 |
| 1966 | 0 | 0.0% | 0.0% | 0.0% | 0 | 25.4% | 0.0% | 0.3% | 0.00 |
| 1968 | 0 | 0.0% | 0.0% | 0.0% | 0 | 25.5% | 0.0% | 0.3% | 0.00 |
| 1970 | 0 | 0.0% | 0.0% | 0.0% | 0 | 25.7% | 0.0% | 0.3% | 0.00 |
| 1972 | 0 | 0.0% | 0.0% | 0.0% | 0 | 25.8% | 0.0% | 0.3% | 0.00 |
| 1974 | 0 | 0.0% | 0.0% | 0.0% | 0 | 25.9% | 0.0% | 0.3% | 0.00 |

|      |   |      |      |      |   |       |      |      |      |
|------|---|------|------|------|---|-------|------|------|------|
| 1976 | 0 | 0.0% | 0.0% | 0.0% | 0 | 26.0% | 0.0% | 0.3% | 0.00 |
| 1978 | 0 | 0.0% | 0.0% | 0.0% | 0 | 26.2% | 0.0% | 0.3% | 0.00 |
| 1980 | 0 | 0.0% | 0.0% | 0.0% | 0 | 26.3% | 0.0% | 0.4% | 0.00 |
| 1982 | 0 | 0.0% | 0.0% | 0.0% | 0 | 26.4% | 0.0% | 0.4% | 0.00 |
| 1984 | 0 | 0.0% | 0.0% | 0.0% | 0 | 26.5% | 0.0% | 0.4% | 0.00 |
| 1986 | 0 | 0.0% | 0.0% | 0.0% | 0 | 26.6% | 0.0% | 0.4% | 0.00 |
| 1988 | 0 | 0.0% | 0.0% | 0.0% | 0 | 26.7% | 0.0% | 0.4% | 0.00 |
| 1990 | 0 | 0.0% | 0.0% | 0.0% | 0 | 26.8% | 0.0% | 0.4% | 0.00 |
| 1992 | 0 | 0.0% | 0.0% | 0.0% | 0 | 27.0% | 0.0% | 0.4% | 0.00 |
| 1994 | 0 | 0.0% | 0.0% | 0.0% | 0 | 27.1% | 0.0% | 0.4% | 0.00 |
| 1996 | 0 | 0.0% | 0.0% | 0.0% | 0 | 27.2% | 0.0% | 0.4% | 0.00 |
| 1998 | 0 | 0.0% | 0.0% | 0.0% | 0 | 27.3% | 0.0% | 0.4% | 0.00 |
| 2000 | 0 | 0.0% | 0.0% | 0.0% | 1 | 27.4% | 0.7% | 0.4% | 0.00 |
| 2002 | 0 | 0.0% | 0.0% | 0.0% | 2 | 27.5% | 1.3% | 0.4% | 0.00 |
| 2004 | 0 | 0.0% | 0.0% | 0.0% | 2 | 27.6% | 1.3% | 0.4% | 0.00 |
| 2006 | 0 | 0.0% | 0.0% | 0.0% | 2 | 27.6% | 1.3% | 0.4% | 0.00 |
| 2008 | 0 | 0.0% | 0.0% | 0.0% | 2 | 27.7% | 1.3% | 0.4% | 0.00 |
| 2010 | 0 | 0.0% | 0.0% | 0.0% | 2 | 27.8% | 1.3% | 0.4% | 0.00 |
| 2012 | 0 | 0.0% | 0.0% | 0.0% | 2 | 27.9% | 1.3% | 0.4% | 0.00 |
| 2014 | 0 | 0.0% | 0.0% | 0.0% | 2 | 28.0% | 1.3% | 0.4% | 0.00 |
| 2016 | 0 | 0.0% | 0.0% | 0.0% | 2 | 28.1% | 1.3% | 0.4% | 0.00 |
| 2018 | 0 | 0.0% | 0.0% | 0.0% | 2 | 28.1% | 1.3% | 0.4% | 0.00 |
| 2020 | 0 | 0.0% | 0.0% | 0.0% | 2 | 28.2% | 1.3% | 0.4% | 0.00 |
| 2022 | 0 | 0.0% | 0.0% | 0.0% | 2 | 28.3% | 1.3% | 0.4% | 0.00 |
| 2024 | 0 | 0.0% | 0.0% | 0.0% | 2 | 28.4% | 1.3% | 0.4% | 0.00 |
| 2026 | 0 | 0.0% | 0.0% | 0.0% | 2 | 28.4% | 1.3% | 0.4% | 0.00 |
| 2028 | 0 | 0.0% | 0.0% | 0.0% | 2 | 28.5% | 1.3% | 0.4% | 0.00 |
| 2030 | 0 | 0.0% | 0.0% | 0.0% | 2 | 28.6% | 1.3% | 0.4% | 0.00 |
| 2032 | 0 | 0.0% | 0.0% | 0.0% | 2 | 28.6% | 1.3% | 0.4% | 0.00 |
| 2034 | 0 | 0.0% | 0.0% | 0.0% | 2 | 28.7% | 1.3% | 0.4% | 0.00 |
| 2036 | 0 | 0.0% | 0.0% | 0.0% | 2 | 28.7% | 1.3% | 0.4% | 0.00 |
| 2038 | 0 | 0.0% | 0.0% | 0.0% | 2 | 28.8% | 1.3% | 0.4% | 0.00 |
| 2040 | 0 | 0.0% | 0.0% | 0.0% | 2 | 28.8% | 1.3% | 0.4% | 0.00 |
| 2042 | 0 | 0.0% | 0.0% | 0.0% | 2 | 28.9% | 1.3% | 0.4% | 0.00 |
| 2044 | 0 | 0.0% | 0.0% | 0.0% | 2 | 28.9% | 1.3% | 0.4% | 0.00 |
| 2046 | 0 | 0.0% | 0.0% | 0.0% | 2 | 29.0% | 1.3% | 0.4% | 0.00 |
| 2048 | 0 | 0.0% | 0.0% | 0.0% | 2 | 29.0% | 1.3% | 0.4% | 0.00 |
| 2050 | 0 | 0.0% | 0.0% | 0.0% | 2 | 29.0% | 1.3% | 0.4% | 0.00 |
| 2052 | 0 | 0.0% | 0.0% | 0.0% | 2 | 29.1% | 1.3% | 0.4% | 0.00 |
| 2054 | 0 | 0.0% | 0.0% | 0.0% | 2 | 29.1% | 1.3% | 0.4% | 0.00 |
| 2056 | 0 | 0.0% | 0.0% | 0.0% | 2 | 29.1% | 1.3% | 0.4% | 0.00 |
| 2058 | 0 | 0.0% | 0.0% | 0.0% | 2 | 29.1% | 1.3% | 0.4% | 0.00 |
| 2060 | 0 | 0.0% | 0.0% | 0.0% | 2 | 29.2% | 1.3% | 0.4% | 0.00 |
| 2062 | 0 | 0.0% | 0.0% | 0.0% | 2 | 29.2% | 1.3% | 0.4% | 0.00 |
| 2064 | 0 | 0.0% | 0.0% | 0.0% | 2 | 29.2% | 1.3% | 0.4% | 0.00 |
| 2066 | 0 | 0.0% | 0.0% | 0.0% | 2 | 29.2% | 1.3% | 0.4% | 0.00 |
| 2068 | 0 | 0.0% | 0.0% | 0.0% | 2 | 29.2% | 1.3% | 0.4% | 0.00 |
| 2070 | 0 | 0.0% | 0.0% | 0.0% | 2 | 29.2% | 1.3% | 0.4% | 0.00 |
| 2072 | 0 | 0.0% | 0.0% | 0.0% | 2 | 29.2% | 1.3% | 0.4% | 0.00 |
| 2074 | 0 | 0.0% | 0.0% | 0.0% | 2 | 29.2% | 1.3% | 0.4% | 0.00 |
| 2076 | 0 | 0.0% | 0.0% | 0.0% | 2 | 29.2% | 1.3% | 0.4% | 0.00 |
| 2078 | 0 | 0.0% | 0.0% | 0.0% | 2 | 29.2% | 1.3% | 0.4% | 0.00 |
| 2080 | 0 | 0.0% | 0.0% | 0.0% | 2 | 29.2% | 1.3% | 0.4% | 0.00 |
| 2082 | 0 | 0.0% | 0.0% | 0.0% | 2 | 29.2% | 1.3% | 0.4% | 0.00 |
| 2084 | 0 | 0.0% | 0.0% | 0.0% | 2 | 29.2% | 1.3% | 0.4% | 0.00 |
| 2086 | 0 | 0.0% | 0.0% | 0.0% | 2 | 29.2% | 1.3% | 0.4% | 0.00 |
| 2088 | 0 | 0.0% | 0.0% | 0.0% | 2 | 29.2% | 1.3% | 0.4% | 0.00 |
| 2090 | 0 | 0.0% | 0.0% | 0.0% | 2 | 29.2% | 1.3% | 0.4% | 0.00 |
| 2092 | 0 | 0.0% | 0.0% | 0.0% | 2 | 29.1% | 1.3% | 0.4% | 0.00 |
| 2094 | 0 | 0.0% | 0.0% | 0.0% | 2 | 29.1% | 1.3% | 0.4% | 0.00 |
| 2096 | 0 | 0.0% | 0.0% | 0.0% | 2 | 29.1% | 1.3% | 0.4% | 0.00 |
| 2098 | 0 | 0.0% | 0.0% | 0.0% | 2 | 29.0% | 1.3% | 0.4% | 0.00 |
| 2100 | 0 | 0.0% | 0.0% | 0.0% | 2 | 29.0% | 1.3% | 0.4% | 0.00 |
| 2102 | 0 | 0.0% | 0.0% | 0.0% | 2 | 29.0% | 1.3% | 0.4% | 0.00 |
| 2104 | 0 | 0.0% | 0.0% | 0.0% | 2 | 28.9% | 1.3% | 0.4% | 0.00 |
| 2106 | 0 | 0.0% | 0.0% | 0.0% | 2 | 28.9% | 1.3% | 0.4% | 0.00 |
| 2108 | 0 | 0.0% | 0.0% | 0.0% | 2 | 28.8% | 1.3% | 0.4% | 0.00 |
| 2110 | 0 | 0.0% | 0.0% | 0.0% | 2 | 28.8% | 1.3% | 0.4% | 0.00 |
| 2112 | 0 | 0.0% | 0.0% | 0.0% | 2 | 28.7% | 1.3% | 0.4% | 0.00 |
| 2114 | 0 | 0.0% | 0.0% | 0.0% | 2 | 28.7% | 1.3% | 0.4% | 0.00 |
| 2116 | 0 | 0.0% | 0.0% | 0.0% | 2 | 28.6% | 1.3% | 0.4% | 0.00 |
| 2118 | 0 | 0.0% | 0.0% | 0.0% | 2 | 28.6% | 1.3% | 0.4% | 0.00 |
| 2120 | 0 | 0.0% | 0.0% | 0.0% | 2 | 28.5% | 1.3% | 0.4% | 0.00 |
| 2122 | 0 | 0.0% | 0.0% | 0.0% | 2 | 28.5% | 1.3% | 0.4% | 0.00 |
| 2124 | 0 | 0.0% | 0.0% | 0.0% | 2 | 28.4% | 1.3% | 0.4% | 0.00 |
| 2126 | 0 | 0.0% | 0.0% | 0.0% | 2 | 28.3% | 1.3% | 0.4% | 0.00 |
| 2128 | 0 | 0.0% | 0.0% | 0.0% | 2 | 28.3% | 1.3% | 0.4% | 0.00 |
| 2130 | 0 | 0.0% | 0.0% | 0.0% | 2 | 28.2% | 1.3% | 0.4% | 0.00 |
| 2132 | 0 | 0.0% | 0.0% | 0.0% | 2 | 28.1% | 1.3% | 0.4% | 0.00 |
| 2134 | 0 | 0.0% | 0.0% | 0.0% | 2 | 28.0% | 1.3% | 0.4% | 0.00 |
| 2136 | 0 | 0.0% | 0.0% | 0.0% | 2 | 27.9% | 1.3% | 0.4% | 0.00 |
| 2138 | 0 | 0.0% | 0.0% | 0.0% | 2 | 27.9% | 1.3% | 0.4% | 0.00 |
| 2140 | 0 | 0.0% | 0.0% | 0.0% | 2 | 27.8% | 1.3% | 0.4% | 0.00 |
| 2142 | 0 | 0.0% | 0.0% | 0.0% | 2 | 27.7% | 1.3% | 0.4% | 0.00 |
| 2144 | 0 | 0.0% | 0.0% | 0.0% | 2 | 27.6% | 1.3% | 0.4% | 0.00 |
| 2146 | 0 | 0.0% | 0.0% | 0.0% | 2 | 27.5% | 1.3% | 0.4% | 0.00 |
| 2148 | 0 | 0.0% | 0.0% | 0.0% | 2 | 27.4% | 1.3% | 0.4% | 0.00 |
| 2150 | 0 | 0.0% | 0.0% | 0.0% | 1 | 27.3% | 0.7% | 0.4% | 0.00 |
| 2152 | 0 | 0.0% | 0.0% | 0.0% | 0 | 27.2% | 0.0% | 0.4% | 0.00 |
| 2154 | 0 | 0.0% | 0.0% | 0.0% | 0 | 27.1% | 0.0% | 0.4% | 0.00 |
| 2156 | 0 | 0.0% | 0.0% | 0.0% | 0 | 27.0% | 0.0% | 0.4% | 0.00 |
| 2158 | 0 | 0.0% | 0.0% | 0.0% | 0 | 26.9% | 0.0% | 0.4% | 0.00 |
| 2160 | 0 | 0.0% | 0.0% | 0.0% | 0 | 26.8% | 0.0% | 0.4% | 0.00 |
| 2162 | 0 | 0.0% | 0.0% | 0.0% | 0 | 26.7% | 0.0% | 0.4% | 0.00 |
| 2164 | 0 | 0.0% | 0.0% | 0.0% | 0 | 26.6% | 0.0% | 0.4% | 0.00 |
| 2166 | 0 | 0.0% | 0.0% | 0.0% | 0 | 26.5% | 0.0% | 0.4% | 0.00 |
| 2168 | 0 | 0.0% | 0.0% | 0.0% | 0 | 26.3% | 0.0% | 0.4% | 0.00 |
| 2170 | 0 | 0.0% | 0.0% | 0.0% | 0 | 26.2% | 0.0% | 0.3% | 0.00 |
| 2172 | 0 | 0.0% | 0.0% | 0.0% | 0 | 26.1% | 0.0% | 0.3% | 0.00 |
| 2174 | 0 | 0.0% | 0.0% | 0.0% | 0 | 26.0% | 0.0% | 0.3% | 0.00 |
| 2176 | 0 | 0.0% | 0.0% | 0.0% | 0 | 25.9% | 0.0% | 0.3% | 0.00 |

|      |   |      |      |      |   |       |      |      |      |
|------|---|------|------|------|---|-------|------|------|------|
| 2178 | 0 | 0.0% | 0.0% | 0.0% | 0 | 25.7% | 0.0% | 0.3% | 0.00 |
| 2180 | 0 | 0.0% | 0.0% | 0.0% | 0 | 25.6% | 0.0% | 0.3% | 0.00 |
| 2182 | 0 | 0.0% | 0.0% | 0.0% | 0 | 25.5% | 0.0% | 0.3% | 0.00 |
| 2184 | 0 | 0.0% | 0.0% | 0.0% | 0 | 25.3% | 0.0% | 0.3% | 0.00 |
| 2186 | 0 | 0.0% | 0.0% | 0.0% | 0 | 25.2% | 0.0% | 0.3% | 0.00 |
| 2188 | 0 | 0.0% | 0.0% | 0.0% | 0 | 25.1% | 0.0% | 0.3% | 0.00 |
| 2190 | 0 | 0.0% | 0.0% | 0.0% | 0 | 24.9% | 0.0% | 0.3% | 0.00 |
| 2192 | 0 | 0.0% | 0.0% | 0.0% | 0 | 24.8% | 0.0% | 0.3% | 0.00 |
| 2194 | 0 | 0.0% | 0.0% | 0.0% | 0 | 24.7% | 0.0% | 0.3% | 0.00 |
| 2196 | 0 | 0.0% | 0.0% | 0.0% | 0 | 24.5% | 0.0% | 0.3% | 0.00 |
| 2198 | 0 | 0.0% | 0.0% | 0.0% | 0 | 24.4% | 0.0% | 0.3% | 0.00 |
| 2200 | 0 | 0.0% | 0.0% | 0.0% | 0 | 24.2% | 0.0% | 0.3% | 0.00 |
| 2202 | 0 | 0.0% | 0.0% | 0.0% | 0 | 24.1% | 0.0% | 0.3% | 0.00 |
| 2204 | 0 | 0.0% | 0.0% | 0.0% | 0 | 23.9% | 0.0% | 0.3% | 0.00 |
| 2206 | 0 | 0.0% | 0.0% | 0.0% | 0 | 23.8% | 0.0% | 0.3% | 0.00 |
| 2208 | 0 | 0.0% | 0.0% | 0.0% | 0 | 23.6% | 0.0% | 0.3% | 0.00 |
| 2210 | 0 | 0.0% | 0.0% | 0.0% | 0 | 23.5% | 0.0% | 0.3% | 0.00 |
| 2212 | 0 | 0.0% | 0.0% | 0.0% | 0 | 23.3% | 0.0% | 0.3% | 0.00 |
| 2214 | 0 | 0.0% | 0.0% | 0.0% | 0 | 23.2% | 0.0% | 0.3% | 0.00 |
| 2216 | 0 | 0.0% | 0.0% | 0.0% | 0 | 23.0% | 0.0% | 0.3% | 0.00 |
| 2218 | 0 | 0.0% | 0.0% | 0.0% | 0 | 22.9% | 0.0% | 0.3% | 0.00 |
| 2220 | 0 | 0.0% | 0.0% | 0.0% | 0 | 22.7% | 0.0% | 0.3% | 0.00 |
| 2222 | 0 | 0.0% | 0.0% | 0.0% | 0 | 22.6% | 0.0% | 0.3% | 0.00 |
| 2224 | 0 | 0.0% | 0.0% | 0.0% | 0 | 22.4% | 0.0% | 0.3% | 0.00 |
| 2226 | 0 | 0.0% | 0.0% | 0.0% | 0 | 22.2% | 0.0% | 0.3% | 0.00 |
| 2228 | 0 | 0.0% | 0.0% | 0.0% | 0 | 22.1% | 0.0% | 0.3% | 0.00 |
| 2230 | 0 | 0.0% | 0.0% | 0.0% | 0 | 21.9% | 0.0% | 0.3% | 0.00 |
| 2232 | 0 | 0.0% | 0.0% | 0.0% | 0 | 21.7% | 0.0% | 0.3% | 0.00 |
| 2234 | 0 | 0.0% | 0.0% | 0.0% | 0 | 21.6% | 0.0% | 0.3% | 0.00 |
| 2236 | 0 | 0.0% | 0.0% | 0.0% | 0 | 21.4% | 0.0% | 0.3% | 0.00 |
| 2238 | 0 | 0.0% | 0.0% | 0.0% | 0 | 21.3% | 0.0% | 0.3% | 0.00 |
| 2240 | 0 | 0.0% | 0.0% | 0.0% | 0 | 21.1% | 0.0% | 0.3% | 0.00 |
| 2242 | 0 | 0.0% | 0.0% | 0.0% | 0 | 20.9% | 0.0% | 0.3% | 0.00 |
| 2244 | 0 | 0.0% | 0.0% | 0.0% | 0 | 20.8% | 0.0% | 0.3% | 0.00 |
| 2246 | 0 | 0.0% | 0.0% | 0.0% | 0 | 20.6% | 0.0% | 0.3% | 0.00 |
| 2248 | 0 | 0.0% | 0.0% | 0.0% | 0 | 20.4% | 0.0% | 0.3% | 0.00 |
| 2250 | 0 | 0.0% | 0.0% | 0.0% | 0 | 20.2% | 0.0% | 0.3% | 0.00 |
| 2252 | 0 | 0.0% | 0.0% | 0.0% | 0 | 20.1% | 0.0% | 0.3% | 0.00 |
| 2254 | 0 | 0.0% | 0.0% | 0.0% | 0 | 19.9% | 0.0% | 0.3% | 0.00 |
| 2256 | 0 | 0.0% | 0.0% | 0.0% | 0 | 19.7% | 0.0% | 0.3% | 0.00 |
| 2258 | 0 | 0.0% | 0.0% | 0.0% | 0 | 19.6% | 0.0% | 0.3% | 0.00 |
| 2260 | 0 | 0.0% | 0.0% | 0.0% | 0 | 19.4% | 0.0% | 0.3% | 0.00 |
| 2262 | 0 | 0.0% | 0.0% | 0.0% | 0 | 19.2% | 0.0% | 0.3% | 0.00 |
| 2264 | 0 | 0.0% | 0.0% | 0.0% | 0 | 19.0% | 0.0% | 0.3% | 0.00 |
| 2266 | 0 | 0.0% | 0.0% | 0.0% | 0 | 18.9% | 0.0% | 0.3% | 0.00 |
| 2268 | 0 | 0.0% | 0.0% | 0.0% | 0 | 18.7% | 0.0% | 0.2% | 0.00 |
| 2270 | 0 | 0.0% | 0.0% | 0.0% | 0 | 18.5% | 0.0% | 0.2% | 0.00 |
| 2272 | 0 | 0.0% | 0.0% | 0.0% | 0 | 18.4% | 0.0% | 0.2% | 0.00 |
| 2274 | 0 | 0.0% | 0.0% | 0.0% | 0 | 18.2% | 0.0% | 0.2% | 0.00 |
| 2276 | 0 | 0.0% | 0.0% | 0.0% | 0 | 18.0% | 0.0% | 0.2% | 0.00 |
| 2278 | 0 | 0.0% | 0.0% | 0.0% | 0 | 17.8% | 0.0% | 0.2% | 0.00 |
| 2280 | 0 | 0.0% | 0.0% | 0.0% | 0 | 17.7% | 0.0% | 0.2% | 0.00 |
| 2282 | 0 | 0.0% | 0.0% | 0.0% | 0 | 17.5% | 0.0% | 0.2% | 0.00 |
| 2284 | 0 | 0.0% | 0.0% | 0.0% | 0 | 17.3% | 0.0% | 0.2% | 0.00 |
| 2286 | 0 | 0.0% | 0.0% | 0.0% | 0 | 17.1% | 0.0% | 0.2% | 0.00 |
| 2288 | 0 | 0.0% | 0.0% | 0.0% | 0 | 17.0% | 0.0% | 0.2% | 0.00 |
| 2290 | 0 | 0.0% | 0.0% | 0.0% | 0 | 16.8% | 0.0% | 0.2% | 0.00 |
| 2292 | 0 | 0.0% | 0.0% | 0.0% | 0 | 16.6% | 0.0% | 0.2% | 0.00 |
| 2294 | 0 | 0.0% | 0.0% | 0.0% | 0 | 16.5% | 0.0% | 0.2% | 0.00 |
| 2296 | 0 | 0.0% | 0.0% | 0.0% | 0 | 16.3% | 0.0% | 0.2% | 0.00 |
| 2298 | 0 | 0.0% | 0.0% | 0.0% | 0 | 16.1% | 0.0% | 0.2% | 0.00 |
| 2300 | 0 | 0.0% | 0.0% | 0.0% | 0 | 15.9% | 0.0% | 0.2% | 0.00 |
| 2302 | 0 | 0.0% | 0.0% | 0.0% | 0 | 15.8% | 0.0% | 0.2% | 0.00 |
| 2304 | 0 | 0.0% | 0.0% | 0.0% | 0 | 15.6% | 0.0% | 0.2% | 0.00 |
| 2306 | 0 | 0.0% | 0.0% | 0.0% | 0 | 15.4% | 0.0% | 0.2% | 0.00 |
| 2308 | 0 | 0.0% | 0.0% | 0.0% | 0 | 15.3% | 0.0% | 0.2% | 0.00 |
| 2310 | 0 | 0.0% | 0.0% | 0.0% | 0 | 15.1% | 0.0% | 0.2% | 0.00 |
| 2312 | 0 | 0.0% | 0.0% | 0.0% | 0 | 14.9% | 0.0% | 0.2% | 0.00 |
| 2314 | 0 | 0.0% | 0.0% | 0.0% | 0 | 14.7% | 0.0% | 0.2% | 0.00 |
| 2316 | 0 | 0.0% | 0.0% | 0.0% | 0 | 14.6% | 0.0% | 0.2% | 0.00 |
| 2318 | 0 | 0.0% | 0.0% | 0.0% | 0 | 14.4% | 0.0% | 0.2% | 0.00 |
| 2320 | 0 | 0.0% | 0.0% | 0.0% | 0 | 14.2% | 0.0% | 0.2% | 0.00 |
| 2322 | 0 | 0.0% | 0.0% | 0.0% | 0 | 14.1% | 0.0% | 0.2% | 0.00 |
| 2324 | 0 | 0.0% | 0.0% | 0.0% | 0 | 13.9% | 0.0% | 0.2% | 0.00 |
| 2326 | 0 | 0.0% | 0.0% | 0.0% | 0 | 13.7% | 0.0% | 0.2% | 0.00 |
| 2328 | 0 | 0.0% | 0.0% | 0.0% | 0 | 13.6% | 0.0% | 0.2% | 0.00 |
| 2330 | 0 | 0.0% | 0.0% | 0.0% | 0 | 13.4% | 0.0% | 0.2% | 0.00 |
| 2332 | 0 | 0.0% | 0.0% | 0.0% | 0 | 13.3% | 0.0% | 0.2% | 0.00 |
| 2334 | 0 | 0.0% | 0.0% | 0.0% | 0 | 13.1% | 0.0% | 0.2% | 0.00 |
| 2336 | 0 | 0.0% | 0.0% | 0.0% | 0 | 12.9% | 0.0% | 0.2% | 0.00 |
| 2338 | 0 | 0.0% | 0.0% | 0.0% | 0 | 12.8% | 0.0% | 0.2% | 0.00 |
| 2340 | 0 | 0.0% | 0.0% | 0.0% | 0 | 12.6% | 0.0% | 0.2% | 0.00 |
| 2342 | 0 | 0.0% | 0.0% | 0.0% | 0 | 12.4% | 0.0% | 0.2% | 0.00 |
| 2344 | 0 | 0.0% | 0.0% | 0.0% | 0 | 12.3% | 0.0% | 0.2% | 0.00 |
| 2346 | 0 | 0.0% | 0.0% | 0.0% | 0 | 12.1% | 0.0% | 0.2% | 0.00 |
| 2348 | 0 | 0.0% | 0.0% | 0.0% | 0 | 12.0% | 0.0% | 0.2% | 0.00 |
| 2350 | 0 | 0.0% | 0.0% | 0.0% | 0 | 11.8% | 0.0% | 0.2% | 0.00 |
| 2352 | 0 | 0.0% | 0.0% | 0.0% | 0 | 11.7% | 0.0% | 0.2% | 0.00 |
| 2354 | 0 | 0.0% | 0.0% | 0.0% | 0 | 11.5% | 0.0% | 0.2% | 0.00 |
| 2356 | 0 | 0.0% | 0.0% | 0.0% | 0 | 11.4% | 0.0% | 0.2% | 0.00 |
| 2358 | 0 | 0.0% | 0.0% | 0.0% | 0 | 11.2% | 0.0% | 0.1% | 0.00 |
| 2360 | 0 | 0.0% | 0.0% | 0.0% | 0 | 11.1% | 0.0% | 0.1% | 0.00 |
| 2362 | 0 | 0.0% | 0.0% | 0.0% | 0 | 10.9% | 0.0% | 0.1% | 0.00 |
| 2364 | 0 | 0.0% | 0.0% | 0.0% | 0 | 10.8% | 0.0% | 0.1% | 0.00 |
| 2366 | 0 | 0.0% | 0.0% | 0.0% | 0 | 10.6% | 0.0% | 0.1% | 0.00 |
| 2368 | 0 | 0.0% | 0.0% | 0.0% | 0 | 10.5% | 0.0% | 0.1% | 0.00 |
| 2370 | 0 | 0.0% | 0.0% | 0.0% | 0 | 10.3% | 0.0% | 0.1% | 0.00 |
| 2372 | 0 | 0.0% | 0.0% | 0.0% | 0 | 10.2% | 0.0% | 0.1% | 0.00 |
| 2374 | 0 | 0.0% | 0.0% | 0.0% | 0 | 10.0% | 0.0% | 0.1% | 0.00 |
| 2376 | 0 | 0.0% | 0.0% | 0.0% | 0 | 9.9%  | 0.0% | 0.1% | 0.00 |
| 2378 | 0 | 0.0% | 0.0% | 0.0% | 0 | 9.7%  | 0.0% | 0.1% | 0.00 |

|      |   |      |      |      |   |      |      |      |      |
|------|---|------|------|------|---|------|------|------|------|
| 2380 | 0 | 0.0% | 0.0% | 0.0% | 0 | 9.6% | 0.0% | 0.1% | 0.00 |
| 2382 | 0 | 0.0% | 0.0% | 0.0% | 0 | 9.5% | 0.0% | 0.1% | 0.00 |
| 2384 | 0 | 0.0% | 0.0% | 0.0% | 0 | 9.3% | 0.0% | 0.1% | 0.00 |
| 2386 | 0 | 0.0% | 0.0% | 0.0% | 0 | 9.2% | 0.0% | 0.1% | 0.00 |
| 2388 | 0 | 0.0% | 0.0% | 0.0% | 0 | 9.0% | 0.0% | 0.1% | 0.00 |
| 2390 | 0 | 0.0% | 0.0% | 0.0% | 0 | 8.9% | 0.0% | 0.1% | 0.00 |
| 2392 | 0 | 0.0% | 0.0% | 0.0% | 0 | 8.8% | 0.0% | 0.1% | 0.00 |
| 2394 | 0 | 0.0% | 0.0% | 0.0% | 0 | 8.6% | 0.0% | 0.1% | 0.00 |
| 2396 | 0 | 0.0% | 0.0% | 0.0% | 0 | 8.5% | 0.0% | 0.1% | 0.00 |
| 2398 | 0 | 0.0% | 0.0% | 0.0% | 0 | 8.4% | 0.0% | 0.1% | 0.00 |
| 2400 | 0 | 0.0% | 0.0% | 0.0% | 0 | 8.3% | 0.0% | 0.1% | 0.00 |
| 2402 | 0 | 0.0% | 0.0% | 0.0% | 0 | 8.1% | 0.0% | 0.1% | 0.00 |
| 2404 | 0 | 0.0% | 0.0% | 0.0% | 0 | 8.0% | 0.0% | 0.1% | 0.00 |
| 2406 | 0 | 0.0% | 0.0% | 0.0% | 0 | 7.9% | 0.0% | 0.1% | 0.00 |
| 2408 | 0 | 0.0% | 0.0% | 0.0% | 0 | 7.8% | 0.0% | 0.1% | 0.00 |
| 2410 | 0 | 0.0% | 0.0% | 0.0% | 0 | 7.6% | 0.0% | 0.1% | 0.00 |
| 2412 | 0 | 0.0% | 0.0% | 0.0% | 0 | 7.5% | 0.0% | 0.1% | 0.00 |
| 2414 | 0 | 0.0% | 0.0% | 0.0% | 0 | 7.4% | 0.0% | 0.1% | 0.00 |
| 2416 | 0 | 0.0% | 0.0% | 0.0% | 0 | 7.3% | 0.0% | 0.1% | 0.00 |
| 2418 | 0 | 0.0% | 0.0% | 0.0% | 0 | 7.2% | 0.0% | 0.1% | 0.00 |
| 2420 | 0 | 0.0% | 0.0% | 0.0% | 0 | 7.0% | 0.0% | 0.1% | 0.00 |
| 2422 | 0 | 0.0% | 0.0% | 0.0% | 0 | 6.9% | 0.0% | 0.1% | 0.00 |
| 2424 | 0 | 0.0% | 0.0% | 0.0% | 0 | 6.8% | 0.0% | 0.1% | 0.00 |
| 2426 | 0 | 0.0% | 0.0% | 0.0% | 0 | 6.7% | 0.0% | 0.1% | 0.00 |
| 2428 | 0 | 0.0% | 0.0% | 0.0% | 0 | 6.6% | 0.0% | 0.1% | 0.00 |
| 2430 | 0 | 0.0% | 0.0% | 0.0% | 0 | 6.5% | 0.0% | 0.1% | 0.00 |
| 2432 | 0 | 0.0% | 0.0% | 0.0% | 0 | 6.4% | 0.0% | 0.1% | 0.00 |
| 2434 | 0 | 0.0% | 0.0% | 0.0% | 0 | 6.3% | 0.0% | 0.1% | 0.00 |
| 2436 | 0 | 0.0% | 0.0% | 0.0% | 0 | 6.1% | 0.0% | 0.1% | 0.00 |
| 2438 | 0 | 0.0% | 0.0% | 0.0% | 0 | 6.0% | 0.0% | 0.1% | 0.00 |
| 2440 | 0 | 0.0% | 0.0% | 0.0% | 0 | 5.9% | 0.0% | 0.1% | 0.00 |
| 2442 | 0 | 0.0% | 0.0% | 0.0% | 0 | 5.8% | 0.0% | 0.1% | 0.00 |
| 2444 | 0 | 0.0% | 0.0% | 0.0% | 0 | 5.7% | 0.0% | 0.1% | 0.00 |
| 2446 | 0 | 0.0% | 0.0% | 0.0% | 0 | 5.6% | 0.0% | 0.1% | 0.00 |
| 2448 | 0 | 0.0% | 0.0% | 0.0% | 0 | 5.5% | 0.0% | 0.1% | 0.00 |
| 2450 | 0 | 0.0% | 0.0% | 0.0% | 0 | 5.4% | 0.0% | 0.1% | 0.00 |
| 2452 | 0 | 0.0% | 0.0% | 0.0% | 0 | 5.3% | 0.0% | 0.1% | 0.00 |
| 2454 | 0 | 0.0% | 0.0% | 0.0% | 0 | 5.2% | 0.0% | 0.1% | 0.00 |
| 2456 | 0 | 0.0% | 0.0% | 0.0% | 0 | 5.1% | 0.0% | 0.1% | 0.00 |
| 2458 | 0 | 0.0% | 0.0% | 0.0% | 0 | 5.1% | 0.0% | 0.1% | 0.00 |
| 2460 | 0 | 0.0% | 0.0% | 0.0% | 0 | 5.0% | 0.0% | 0.1% | 0.00 |
| 2462 | 0 | 0.0% | 0.0% | 0.0% | 0 | 4.9% | 0.0% | 0.1% | 0.00 |
| 2464 | 0 | 0.0% | 0.0% | 0.0% | 0 | 4.8% | 0.0% | 0.1% | 0.00 |
| 2466 | 0 | 0.0% | 0.0% | 0.0% | 0 | 4.7% | 0.0% | 0.1% | 0.00 |
| 2468 | 0 | 0.0% | 0.0% | 0.0% | 0 | 4.6% | 0.0% | 0.1% | 0.00 |
| 2470 | 0 | 0.0% | 0.0% | 0.0% | 0 | 4.5% | 0.0% | 0.1% | 0.00 |
| 2472 | 0 | 0.0% | 0.0% | 0.0% | 0 | 4.4% | 0.0% | 0.1% | 0.00 |
| 2474 | 0 | 0.0% | 0.0% | 0.0% | 0 | 4.4% | 0.0% | 0.1% | 0.00 |
| 2476 | 0 | 0.0% | 0.0% | 0.0% | 0 | 4.3% | 0.0% | 0.1% | 0.00 |
| 2478 | 0 | 0.0% | 0.0% | 0.0% | 0 | 4.2% | 0.0% | 0.1% | 0.0  |

[illegible]

[illegible]





[illegible]

[illegible]

[illegible]

[illegible]

|      |   |      |      |      |   |      |      |      |      |
|------|---|------|------|------|---|------|------|------|------|
| 3996 | 0 | 0.0% | 0.0% | 0.0% | 0 | 0.0% | 0.0% | 0.0% | 0.00 |
| 3998 | 0 | 0.0% | 0.0% | 0.0% | 0 | 0.0% | 0.0% | 0.0% | 0.00 |
| 4000 | 0 | 0.0% | 0.0% | 0.0% | 0 | 0.0% | 0.0% | 0.0% | 0.00 |

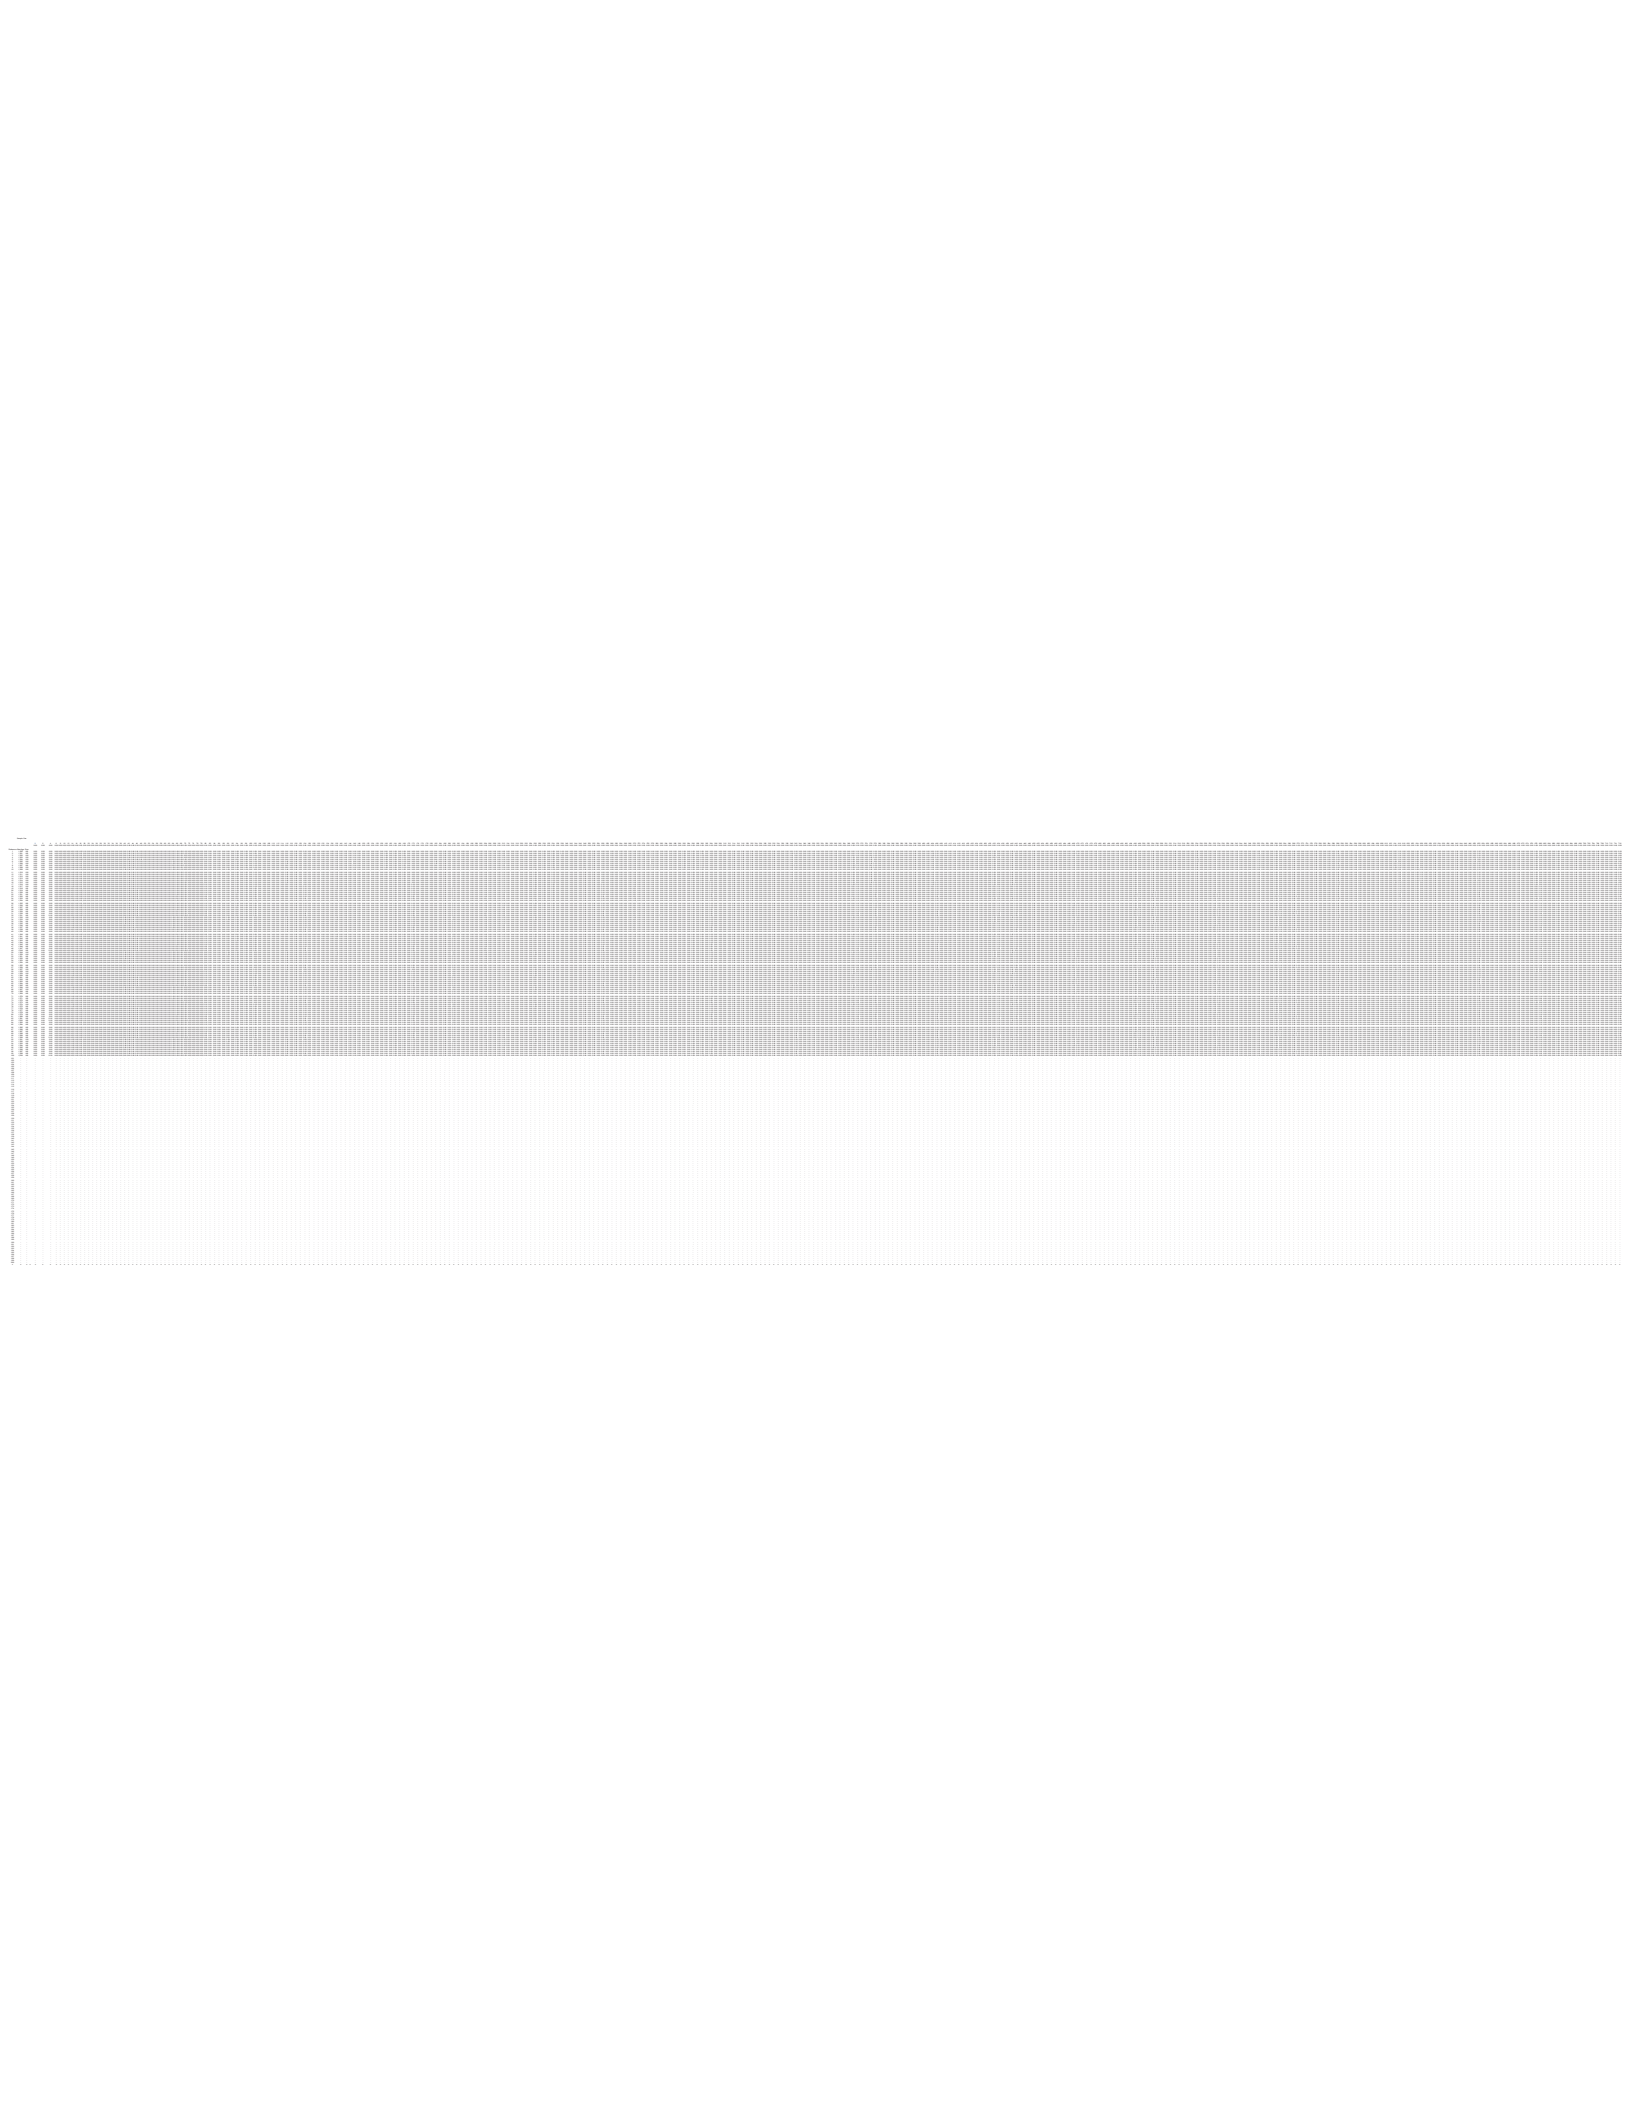













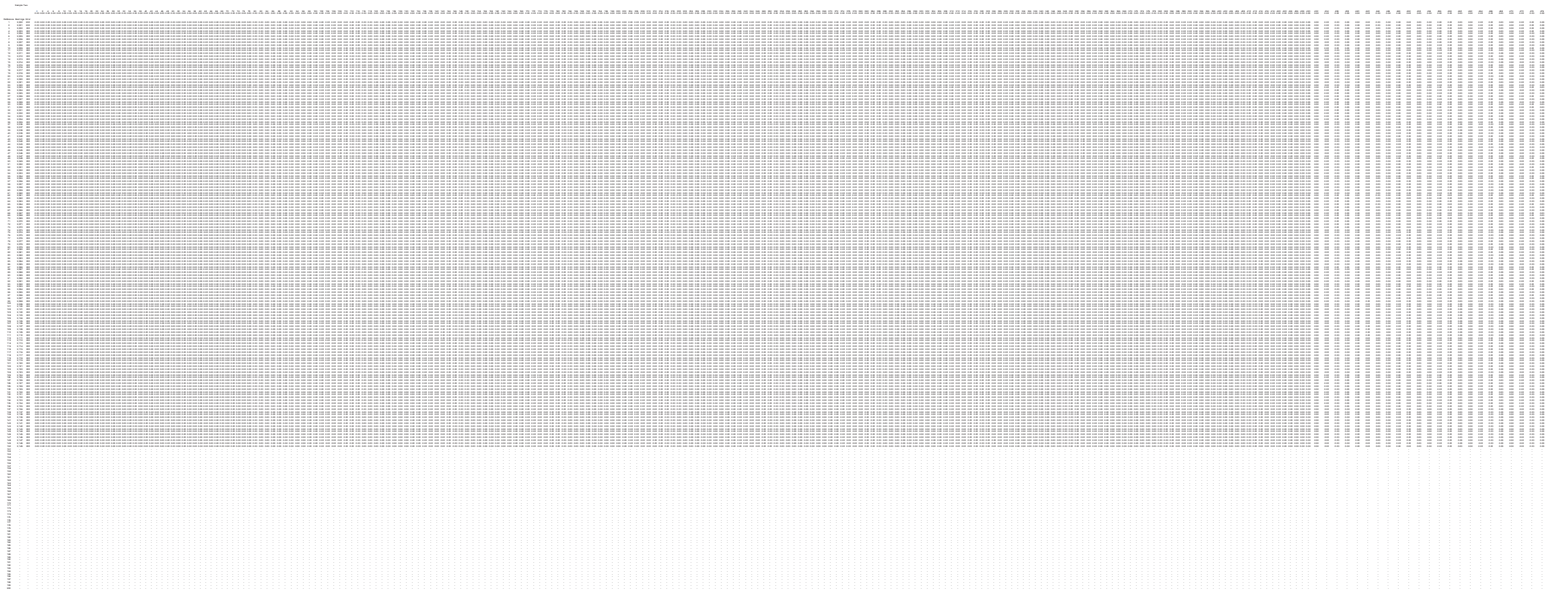

Supplement: Supplementary file 1 [file 1]
